# Supplementary material for: Identifying biochemical constituents involved in the mycosynthesis of zinc oxide nanoparticles
Source: Royal Society of Chemistry journal article supplement (doi:10.1039/d4nr00624k), 2024-01-01
Supplement: d4nr00624k1.pdf [file d4nr00624k1.pdf]

## Supporting Information

### **Identifying biochemical constituents involved in the mycosynthesis of zinc oxide nanoparticles**

*Nathan G. Brady, Shamus L. O'Leary, Winson Kuo, Brett R. Blackwell, Philip M. Mach, John Watt, and George D. Bachand*

**Table S1.** Proteome of *Aspergillus niger* following 1 mM Zn challenge.

| #  | Accession  | Description                                                                                                                                          | Coverage [%] | # Peptides |
|----|------------|------------------------------------------------------------------------------------------------------------------------------------------------------|--------------|------------|
| 1  | A0A124BW99 | 3-isopropylmalate dehydrogenase<br>OS= <i>Aspergillus niger</i> OX=5061<br>GN=ABL_02721 PE=3 SV=1                                                    | 2            | 1          |
| 2  | A0A100I9W6 | 4-hydroxyphenylpyruvate dioxygenase<br>OS= <i>Aspergillus niger</i> OX=5061<br>GN=ABL_02088 PE=3 SV=1                                                | 10           | 1          |
| 3  | A0A117DYT5 | 5-methyltetrahydropteroyltriglutamate--<br>homocysteine S-methyltransferase<br>OS= <i>Aspergillus niger</i> OX=5061<br>GN=ABL_02132 PE=3 SV=1        | 1            | 1          |
| 4  | A0A319A3N3 | AB hydrolase-1 domain-containing protein<br>OS= <i>Aspergillus lacticoffeatus</i> (strain CBS<br>101883) OX=1450533<br>GN=BO96DRAFT_342582 PE=4 SV=1 | 5            | 1          |
| 5  | A0A505HX38 | ABC transporter family protein<br>OS= <i>Aspergillus niger</i> OX=5061<br>GN=CAN33_0042725 PE=4 SV=1                                                 | 7            | 1          |
| 6  | A0A100IQI4 | ABC transporter OS= <i>Aspergillus niger</i><br>OX=5061 GN=ABL_08150 PE=4 SV=1                                                                       | 4            | 1          |
| 7  | Q1JTV6     | Acetyl-CoA carboxylase OS= <i>Aspergillus niger</i><br>OX=5061 GN=accA PE=4 SV=1                                                                     | 0            | 1          |
| 8  | A0A370BHM8 | Alcohol dehydrogenase OS= <i>Aspergillus niger</i><br>ATCC 13496 OX=1353008<br>GN=M747DRAFT_335378 PE=4 SV=1                                         | 3            | 1          |
| 9  | A0A100IRC6 | Alcohol dehydrogenase OS= <i>Aspergillus niger</i><br>OX=5061 GN=ABL_08421 PE=3 SV=1                                                                 | 6            | 1          |
| 10 | A0A370BGA4 | Alcohol oxidase OS= <i>Aspergillus niger</i> ATCC<br>13496 OX=1353008 GN=M747DRAFT_362794<br>PE=3 SV=1                                               | 4            | 1          |
| 11 | A0A319AH66 | Aldo/keto reductase OS= <i>Aspergillus</i><br><i>lacticoffeatus</i> (strain CBS 101883)<br>OX=1450533 GN=BO96DRAFT_226298 PE=4<br>SV=1               | 8            | 1          |
| 12 | A0A319A7L9 | Aldo/keto reductase OS= <i>Aspergillus</i><br><i>lacticoffeatus</i> (strain CBS 101883)<br>OX=1450533 GN=BO96DRAFT_395911 PE=4<br>SV=1               | 6            | 1          |
| 13 | A0A117DWV8 | alpha-galactosidase OS= <i>Aspergillus niger</i><br>OX=5061 GN=ABL_01986 PE=4 SV=1                                                                   | 5            | 1          |
| 14 | A0A254TL69 | Alpha/beta hydrolase family protein<br>OS= <i>Aspergillus niger</i> OX=5061<br>GN=ATCC64974_109640 PE=4 SV=1                                         | 1            | 1          |
| 15 | A0A100ISX4 | Amidohydrolase family protein<br>OS= <i>Aspergillus niger</i> OX=5061<br>GN=ABL_09395 PE=4 SV=1                                                      | 7            | 1          |
| 16 | A0A117E0L8 | AMP dependent CoA ligase OS= <i>Aspergillus</i><br><i>niger</i> OX=5061 GN=ABL_05403 PE=4 SV=1                                                       | 4            | 1          |
| 17 | A0A319AKQ2 | ANK_REP_REGION domain-containing                                                                                                                     | 3            | 1          |

|    |            |                                                                                                                                                                                                     |    |   |
|----|------------|-----------------------------------------------------------------------------------------------------------------------------------------------------------------------------------------------------|----|---|
|    |            | protein OS=Aspergillus lacticoffeatus (strain CBS 101883) OX=1450533<br>GN=BO96DRAFT_497773 PE=4 SV=1                                                                                               |    |   |
| 18 | A0A10011T8 | Ankyrin repeat-containing protein, putative<br>OS=Aspergillus niger OX=5061<br>GN=ABL_00023 PE=4 SV=1                                                                                               | 3  | 1 |
| 19 | A0A117E351 | APH domain-containing protein<br>OS=Aspergillus niger OX=5061<br>GN=ABL_09199 PE=4 SV=1                                                                                                             | 6  | 1 |
| 20 | A0A505IE24 | ATP synthase F1, beta subunit OS=Aspergillus niger OX=5061 GN=CAN33_0027245 PE=4 SV=1                                                                                                               | 7  | 1 |
| 21 | A0A370C3R5 | ATP synthase subunit d, mitochondrial<br>OS=Aspergillus niger ATCC 13496<br>OX=1353008 GN=M747DRAFT_294127 PE=3 SV=1                                                                                | 16 | 1 |
| 22 | A0A370BYZ1 | ATP-dependent RNA helicase DED1<br>OS=Aspergillus niger ATCC 13496<br>OX=1353008 GN=M747DRAFT_235958 PE=3 SV=1                                                                                      | 2  | 1 |
| 23 | A0A254UFH6 | beta-glucosidase OS=Aspergillus niger<br>OX=5061 GN=ATCC64974_91770 PE=3 SV=1                                                                                                                       | 5  | 1 |
| 24 | A0A319AA60 | BZIP domain-containing protein<br>OS=Aspergillus lacticoffeatus (strain CBS 101883) OX=1450533<br>GN=BO96DRAFT_456833 PE=4 SV=1                                                                     | 2  | 1 |
| 25 | A0A100IGA6 | BZIP-type transcription factor OS=Aspergillus niger OX=5061 GN=ABL_03762 PE=4 SV=1                                                                                                                  | 3  | 1 |
| 26 | G3Y1Z3     | CAP-Gly domain-containing protein<br>OS=Aspergillus niger (strain ATCC 1015 / CBS 113.46 / FGSC A1144 / LSHB Ac4 / NCTC 3858a / NRRL 328 / USDA 3528.7)<br>OX=380704 GN=ASPNIDRAFT_206560 PE=3 SV=1 | 1  | 1 |
| 27 | A0A100IJ86 | Carboxylic ester hydrolase OS=Aspergillus niger OX=5061 GN=ABL_04880 PE=3 SV=1                                                                                                                      | 4  | 1 |
| 28 | A0A370C5Q8 | CHAT domain-containing protein<br>OS=Aspergillus niger ATCC 13496<br>OX=1353008 GN=M747DRAFT_235560 PE=3 SV=1                                                                                       | 2  | 2 |
| 29 | A0A117E1A3 | chitin synthase OS=Aspergillus niger OX=5061<br>GN=ABL_06376 PE=4 SV=1                                                                                                                              | 1  | 1 |
| 30 | A0A117E2D8 | Chromatin-remodeling ATPase INO80<br>OS=Aspergillus niger OX=5061<br>GN=ABL_08056 PE=3 SV=1                                                                                                         | 1  | 1 |
| 31 | A2Q8M3     | Contig An01c0170, genomic contig<br>OS=Aspergillus niger (strain CBS 513.88 / FGSC A1513) OX=425011 GN=An01g04860<br>PE=4 SV=1                                                                      | 8  | 1 |
| 32 | A2Q917     | Contig An01c0230, genomic contig<br>OS=Aspergillus niger (strain CBS 513.88 / FGSC A1513) OX=425011 GN=An01g06320                                                                                   | 4  | 1 |

|    |        |                                                                                                                                   |   |   |
|----|--------|-----------------------------------------------------------------------------------------------------------------------------------|---|---|
|    |        | PE=4 SV=1                                                                                                                         |   |   |
| 33 | A2QAK7 | Contig An01c0350, genomic contig<br>OS=Aspergillus niger (strain CBS 513.88 /<br>FGSC A1513) OX=425011 GN=An01g11860<br>PE=4 SV=1 | 2 | 1 |
| 34 | A2QAZ0 | Contig An01c0400, genomic contig<br>OS=Aspergillus niger (strain CBS 513.88 /<br>FGSC A1513) OX=425011 GN=An01g13280<br>PE=4 SV=1 | 1 | 1 |
| 35 | A2QKD4 | Contig An04c0390, genomic contig<br>OS=Aspergillus niger (strain CBS 513.88 /<br>FGSC A1513) OX=425011 GN=An04g10230<br>PE=3 SV=1 | 2 | 1 |
| 36 | A2QLH1 | Contig An06c0070, genomic contig<br>OS=Aspergillus niger (strain CBS 513.88 /<br>FGSC A1513) OX=425011 GN=An06g01180<br>PE=4 SV=1 | 5 | 1 |
| 37 | A2QSN4 | Contig An08c0280, genomic contig<br>OS=Aspergillus niger (strain CBS 513.88 /<br>FGSC A1513) OX=425011 GN=An08g11350<br>PE=4 SV=1 | 5 | 1 |
| 38 | A2QTH2 | Contig An09c0050, genomic contig<br>OS=Aspergillus niger (strain CBS 513.88 /<br>FGSC A1513) OX=425011 GN=An09g02100<br>PE=4 SV=1 | 1 | 1 |
| 39 | A2QYD0 | Contig An12c0030, genomic contig<br>OS=Aspergillus niger (strain CBS 513.88 /<br>FGSC A1513) OX=425011 GN=An12g00800<br>PE=4 SV=1 | 1 | 1 |
| 40 | A2QZW5 | Contig An12c0190, genomic contig<br>OS=Aspergillus niger (strain CBS 513.88 /<br>FGSC A1513) OX=425011 GN=An12g06470<br>PE=4 SV=1 | 3 | 1 |
| 41 | A2R110 | Contig An12c0370, genomic contig<br>OS=Aspergillus niger (strain CBS 513.88 /<br>FGSC A1513) OX=425011 GN=An12g10530<br>PE=4 SV=1 | 2 | 1 |
| 42 | A2R248 | Contig An13c0110, genomic contig<br>OS=Aspergillus niger (strain CBS 513.88 /<br>FGSC A1513) OX=425011 GN=An13g03520<br>PE=4 SV=1 | 3 | 1 |
| 43 | A2R3X7 | Contig An14c0180, genomic contig<br>OS=Aspergillus niger (strain CBS 513.88 /<br>FGSC A1513) OX=425011 GN=An14g05840<br>PE=4 SV=1 | 4 | 1 |
| 44 | A2R4R4 | Contig An15c0090, genomic contig<br>OS=Aspergillus niger (strain CBS 513.88 /<br>FGSC A1513) OX=425011 GN=An15g01320<br>PE=3 SV=1 | 1 | 1 |
| 45 | A2R5X6 | Contig An15c0200, genomic contig<br>OS=Aspergillus niger (strain CBS 513.88 /<br>FGSC A1513) OX=425011 GN=An15g05900              | 8 | 1 |

|    |            |                                                                                                                                           |    |   |
|----|------------|-------------------------------------------------------------------------------------------------------------------------------------------|----|---|
|    |            | PE=4 SV=1                                                                                                                                 |    |   |
| 46 | A2R701     | Contig An16c0070, genomic contig<br>OS=Aspergillus niger (strain CBS 513.88 /<br>FGSC A1513) OX=425011 GN=An16g01800<br>PE=4 SV=1         | 3  | 1 |
| 47 | A2R8G7     | Contig An16c0230, genomic contig<br>OS=Aspergillus niger (strain CBS 513.88 /<br>FGSC A1513) OX=425011 GN=An16g07090<br>PE=4 SV=1         | 6  | 1 |
| 48 | A2R984     | Contig An17c0020, genomic contig<br>OS=Aspergillus niger (strain CBS 513.88 /<br>FGSC A1513) OX=425011 GN=An17g00470<br>PE=4 SV=1         | 11 | 1 |
| 49 | A2RAU5     | Contig An18c0150, genomic contig<br>OS=Aspergillus niger (strain CBS 513.88 /<br>FGSC A1513) OX=425011 GN=An18g04370<br>PE=4 SV=1         | 81 | 1 |
| 50 | A0A117DXJ9 | CrpH protein OS=Aspergillus niger OX=5061<br>GN=ABL_02506 PE=3 SV=1                                                                       | 2  | 1 |
| 51 | A0A505IPU9 | Cyclic nucleotide-binding domain family<br>protein OS=Aspergillus niger OX=5061<br>GN=CAN33_0035860 PE=4 SV=1                             | 5  | 1 |
| 52 | A0A370BPR4 | Cytochrome P450 OS=Aspergillus niger ATCC<br>13496 OX=1353008 GN=M747DRAFT_335399<br>PE=4 SV=1                                            | 3  | 1 |
| 53 | A0A3F3RRN7 | Cytoplasmic protein OS=Aspergillus niger<br>OX=5061 GN=ATCC64974_83590 PE=4 SV=1                                                          | 18 | 1 |
| 54 | A2QGI9     | D-arabinono-1,4-lactone oxidase<br>OS=Aspergillus niger (strain CBS 513.88 /<br>FGSC A1513) OX=425011 GN=An03g03460<br>PE=3 SV=1          | 4  | 1 |
| 55 | A0A319AA99 | Delta-aminolevulinic acid dehydratase<br>OS=Aspergillus lacticoffeatus (strain CBS<br>101883) OX=1450533<br>GN=BO96DRAFT_412557 PE=3 SV=1 | 7  | 1 |
| 56 | A0A100INU1 | Dihydroxy-acid dehydratase OS=Aspergillus<br>niger OX=5061 GN=ABL_07287 PE=3 SV=1                                                         | 5  | 1 |
| 57 | A0A319A6B3 | Dipeptidyl-peptidase V OS=Aspergillus<br>lacticoffeatus (strain CBS 101883)<br>OX=1450533 GN=BO96DRAFT_415625 PE=3<br>SV=1                | 3  | 1 |
| 58 | A0A254UH30 | DNA polymerase kappa OS=Aspergillus niger<br>OX=5061 GN=ATCC64974_40550 PE=4 SV=1                                                         | 2  | 1 |
| 59 | A0A3F3R8X9 | DNA repair protein RAD16 OS=Aspergillus<br>niger OX=5061 GN=ATCC64974_23690 PE=3<br>SV=1                                                  | 4  | 1 |
| 60 | A0A100I3M4 | DNA repair protein Rad50 OS=Aspergillus<br>niger OX=5061 GN=ABL_00526 PE=3 SV=1                                                           | 1  | 1 |
| 61 | A0A100ICF8 | Dolichyl-phosphate-mannose--protein<br>mannosyltransferase OS=Aspergillus niger<br>OX=5061 GN=ABL_02731 PE=3 SV=1                         | 3  | 1 |
| 62 | G3XU68     | DUF2007 domain-containing protein                                                                                                         | 5  | 1 |

|    |            |                                                                                                                                                                                                          |   |   |
|----|------------|----------------------------------------------------------------------------------------------------------------------------------------------------------------------------------------------------------|---|---|
|    |            | OS=Aspergillus niger (strain ATCC 1015 / CBS 113.46 / FGSC A1144 / LSHB Ac4 / NCTC 3858a / NRRL 328 / USDA 3528.7)<br>OX=380704 GN=ASPNIDRAFT_43889 PE=4 SV=1                                            |   |   |
| 63 | G3XYR9     | Dynein light intermediate chain<br>OS=Aspergillus niger (strain ATCC 1015 / CBS 113.46 / FGSC A1144 / LSHB Ac4 / NCTC 3858a / NRRL 328 / USDA 3528.7)<br>OX=380704 GN=ASPNIDRAFT_181494 PE=4 SV=1        | 2 | 1 |
| 64 | A2R4M7     | E3 ubiquitin protein ligase OS=Aspergillus niger (strain CBS 513.88 / FGSC A1513)<br>OX=425011 GN=An15g00950 PE=3 SV=1                                                                                   | 2 | 1 |
| 65 | A0A100I6Z2 | Efflux pump antibiotic resistance protein<br>OS=Aspergillus niger OX=5061<br>GN=ABL_01342 PE=4 SV=1                                                                                                      | 2 | 1 |
| 66 | A0A319AXN7 | ELMO domain-containing protein<br>OS=Aspergillus lacticoffeatus (strain CBS 101883) OX=1450533<br>GN=BO96DRAFT_428019 PE=4 SV=1                                                                          | 3 | 1 |
| 67 | A0A100IGB1 | Enoyl-CoA hydratase/isomerase family protein OS=Aspergillus niger OX=5061<br>GN=ABL_03776 PE=4 SV=1                                                                                                      | 6 | 1 |
| 68 | A0A319AWI5 | Eukaryotic translation initiation factor 3 subunit A OS=Aspergillus lacticoffeatus (strain CBS 101883) OX=1450533 GN=TIF32<br>PE=3 SV=1                                                                  | 2 | 1 |
| 69 | A0A319AS46 | Eukaryotic translation initiation factor 3 subunit E OS=Aspergillus lacticoffeatus (strain CBS 101883) OX=1450533 GN=INT6 PE=3<br>SV=1                                                                   | 5 | 1 |
| 70 | G3Y7T4     | FAD_binding_3 domain-containing protein<br>OS=Aspergillus niger (strain ATCC 1015 / CBS 113.46 / FGSC A1144 / LSHB Ac4 / NCTC 3858a / NRRL 328 / USDA 3528.7)<br>OX=380704 GN=ASPNIDRAFT_44604 PE=4 SV=1 | 7 | 1 |
| 71 | A0A505ILT5 | Fatty acid synthase OS=Aspergillus niger<br>OX=5061 GN=CAN33_0051120 PE=4 SV=1                                                                                                                           | 0 | 1 |
| 72 | A0A254UE40 | Flavin containing amine oxidoreductase family protein OS=Aspergillus niger OX=5061<br>GN=ATCC64974_33860 PE=4 SV=1                                                                                       | 2 | 1 |
| 73 | A0A100IDC3 | FSH1 domain-containing protein<br>OS=Aspergillus niger OX=5061<br>GN=ABL_02989 PE=4 SV=1                                                                                                                 | 4 | 1 |
| 74 | G3XPX6     | Fungal_trans domain-containing protein<br>OS=Aspergillus niger (strain ATCC 1015 / CBS 113.46 / FGSC A1144 / LSHB Ac4 / NCTC 3858a / NRRL 328 / USDA 3528.7)<br>OX=380704 GN=ASPNIDRAFT_44761 PE=4 SV=1  | 4 | 1 |

|    |            |                                                                                                                                                                                                                          |    |   |
|----|------------|--------------------------------------------------------------------------------------------------------------------------------------------------------------------------------------------------------------------------|----|---|
| 75 | G3Y0E5     | G_PROTEIN_RECEP_F2_4 domain-containing protein (Fragment) OS=Aspergillus niger (strain ATCC 1015 / CBS 113.46 / FGSC A1144 / LSHB Ac4 / NCTC 3858a / NRRL 328 / USDA 3528.7) OX=380704<br>GN=ASPNIDRAFT_181551 PE=4 SV=1 | 7  | 1 |
| 76 | A0A370C116 | General substrate transporter OS=Aspergillus niger ATCC 13496 OX=1353008<br>GN=M747DRAFT_296052 PE=3 SV=1                                                                                                                | 3  | 1 |
| 77 | A0A319A327 | Glutamine synthetase/guanido kinase OS=Aspergillus lacticoffeatus (strain CBS 101883) OX=1450533<br>GN=BO96DRAFT_343380 PE=3 SV=1                                                                                        | 4  | 1 |
| 78 | A0A124BUR9 | Glycogen debranching enzyme Gdb1 OS=Aspergillus niger OX=5061<br>GN=ABL_00375 PE=4 SV=1                                                                                                                                  | 1  | 1 |
| 79 | G3Y3Q0     | Glycos_transf_1 domain-containing protein OS=Aspergillus niger (strain ATCC 1015 / CBS 113.46 / FGSC A1144 / LSHB Ac4 / NCTC 3858a / NRRL 328 / USDA 3528.7) OX=380704 GN=ASPNIDRAFT_52318 PE=4 SV=1                     | 1  | 1 |
| 80 | A0A3F3R6T1 | Glycosidase OS=Aspergillus niger OX=5061<br>GN=ATCC64974_14620 PE=3 SV=1                                                                                                                                                 | 2  | 1 |
| 81 | A0A370BT40 | GTP-binding protein Obg OS=Aspergillus niger ATCC 13496 OX=1353008<br>GN=M747DRAFT_297006 PE=4 SV=1                                                                                                                      | 4  | 1 |
| 82 | A0A100IIZ3 | HEAT repeat protein OS=Aspergillus niger OX=5061 GN=ABL_04748 PE=4 SV=1                                                                                                                                                  | 1  | 1 |
| 83 | A0A319BB09 | HET domain-containing protein OS=Aspergillus lacticoffeatus (strain CBS 101883) OX=1450533<br>GN=BO96DRAFT_502130 PE=4 SV=1                                                                                              | 4  | 1 |
| 84 | A0A100IUP3 | HET domain-containing protein OS=Aspergillus niger OX=5061<br>GN=ABL_10193 PE=4 SV=1                                                                                                                                     | 3  | 1 |
| 85 | A0A370BUC2 | IPT/TIG domain-containing protein OS=Aspergillus niger ATCC 13496 OX=1353008 GN=M747DRAFT_66209 PE=4 SV=1                                                                                                                | 2  | 1 |
| 86 | Q6RZ15     | Ketosynthase (Fragment) OS=Aspergillus niger OX=5061 PE=4 SV=1                                                                                                                                                           | 11 | 1 |
| 87 | A0A370BVT3 | Kinase-like protein (Fragment) OS=Aspergillus niger ATCC 13496 OX=1353008<br>GN=M747DRAFT_284773 PE=4 SV=1                                                                                                               | 9  | 1 |
| 88 | G3Y1G7     | Kinesin-like protein OS=Aspergillus niger (strain ATCC 1015 / CBS 113.46 / FGSC A1144 / LSHB Ac4 / NCTC 3858a / NRRL 328 / USDA 3528.7) OX=380704<br>GN=ASPNIDRAFT_206452 PE=3 SV=1                                      | 3  | 1 |
| 89 | A0A100I5M6 | Kinesin-like protein OS=Aspergillus niger OX=5061 GN=ABL_01077 PE=3 SV=1                                                                                                                                                 | 3  | 1 |

|     |            |                                                                                                                              |   |   |
|-----|------------|------------------------------------------------------------------------------------------------------------------------------|---|---|
| 90  | A0A254UGL8 | Mediator of RNA polymerase II transcription subunit 12 OS=Aspergillus niger OX=5061 GN=ATCC64974_94900 PE=3 SV=1             | 1 | 1 |
| 91  | A0A117DUP2 | MesA OS=Aspergillus niger OX=5061 GN=ABL_00298 PE=4 SV=1                                                                     | 3 | 1 |
| 92  | A0A370BVA2 | Metallo-dependent hydrolase OS=Aspergillus niger ATCC 13496 OX=1353008 GN=M747DRAFT_282090 PE=4 SV=1                         | 4 | 1 |
| 93  | A0A319AKK6 | MFS domain-containing protein OS=Aspergillus lacticoffeatus (strain CBS 101883) OX=1450533 GN=BO96DRAFT_497262 PE=3 SV=1     | 3 | 1 |
| 94  | A0A319AK89 | MFS general substrate transporter OS=Aspergillus lacticoffeatus (strain CBS 101883) OX=1450533 GN=BO96DRAFT_435090 PE=4 SV=1 | 3 | 1 |
| 95  | A0A100ICG2 | MFS monosaccharide transporter OS=Aspergillus niger OX=5061 GN=ABL_02730 PE=3 SV=1                                           | 2 | 1 |
| 96  | A0A117E3H1 | MFS transporter OS=Aspergillus niger OX=5061 GN=ABL_09739 PE=4 SV=1                                                          | 5 | 1 |
| 97  | A0A505HXE4 | Mitochondrial 54S ribosomal protein YmL24/YmL14 OS=Aspergillus niger OX=5061 GN=CAN33_002395 PE=3 SV=1                       | 4 | 1 |
| 98  | A0A100IFQ1 | Mitochondrial thiamine pyrophosphate carrier 1 OS=Aspergillus niger OX=5061 GN=ABL_03598 PE=3 SV=1                           | 4 | 1 |
| 99  | A0A117DZQ5 | N-acetyltransferase complex ARD1 subunit OS=Aspergillus niger OX=5061 GN=ABL_04136 PE=3 SV=1                                 | 9 | 1 |
| 100 | A0A100IU28 | N2,N2-dimethylguanosine tRNA methyltransferase OS=Aspergillus niger OX=5061 GN=ABL_09986 PE=3 SV=1                           | 4 | 1 |
| 101 | A0A100I720 | NAD_binding_9 domain-containing protein OS=Aspergillus niger OX=5061 GN=ABL_01165 PE=4 SV=1                                  | 5 | 1 |
| 102 | A0A319ACJ4 | NB-ARC domain-containing protein OS=Aspergillus lacticoffeatus (strain CBS 101883) OX=1450533 GN=BO96DRAFT_392709 PE=4 SV=1  | 1 | 1 |
| 103 | A0A319AIT3 | Ntox15 domain-containing protein OS=Aspergillus lacticoffeatus (strain CBS 101883) OX=1450533 GN=BO96DRAFT_486782 PE=4 SV=1  | 5 | 1 |
| 104 | A0A100I939 | Nuclear condensin complex subunit 3 OS=Aspergillus niger OX=5061 GN=ABL_01943 PE=3 SV=1                                      | 2 | 1 |
| 105 | A0A370CBX7 | Nuclear protein export protein Yrb2 OS=Aspergillus niger ATCC 13496 OX=1353008 GN=M747DRAFT_301174 PE=4 SV=1                 | 5 | 1 |
| 106 | A0A319AHF5 | Nuclear RNA binding protein OS=Aspergillus                                                                                   | 2 | 1 |



|     |            |                                                                                                                                                                                                             |    |   |
|-----|------------|-------------------------------------------------------------------------------------------------------------------------------------------------------------------------------------------------------------|----|---|
|     |            | lacticoffeatus (strain CBS 101883)<br>OX=1450533 GN=BO96DRAFT_410156 PE=4<br>SV=1                                                                                                                           |    |   |
| 107 | A0A370BT93 | Nucleolar protein 12 OS=Aspergillus niger<br>ATCC 13496 OX=1353008<br>GN=M747DRAFT_266812 PE=3 SV=1                                                                                                         | 4  | 1 |
| 108 | A2QIU5     | oxoglutarate dehydrogenase (succinyl-<br>transferring) OS=Aspergillus niger (strain CBS<br>513.88 / FGSC A1513) OX=425011<br>GN=An04g04750 PE=3 SV=1                                                        | 1  | 1 |
| 109 | A0A319AHX1 | P-loop containing nucleoside triphosphate<br>hydrolase protein OS=Aspergillus<br>lacticoffeatus (strain CBS 101883)<br>OX=1450533 GN=BO96DRAFT_386832 PE=4<br>SV=1                                          | 3  | 1 |
| 110 | A0A100IPC8 | P-loop containing nucleoside triphosphate<br>hydrolase protein OS=Aspergillus niger<br>OX=5061 GN=ABL_07557 PE=4 SV=1                                                                                       | 5  | 1 |
| 111 | A0A319A823 | Peptidase inhibitor I78 family protein<br>OS=Aspergillus lacticoffeatus (strain CBS<br>101883) OX=1450533<br>GN=BO96DRAFT_53946 PE=4 SV=1                                                                   | 29 | 1 |
| 112 | A0A3F3RNC4 | peptidylprolyl isomerase OS=Aspergillus niger<br>OX=5061 GN=ATCC64974_72870 PE=4 SV=1                                                                                                                       | 3  | 1 |
| 113 | A0A254U6F1 | Permease for cytosine/purine, uracil,<br>thiamine, allantoin family protein<br>OS=Aspergillus niger OX=5061<br>GN=ATCC64974_26260 PE=3 SV=1                                                                 | 21 | 2 |
| 114 | A0A254TPQ3 | Peroxidase, 2 family protein OS=Aspergillus<br>niger OX=5061 GN=ATCC64974_97090 PE=4<br>SV=1                                                                                                                | 1  | 1 |
| 115 | A0A100IP08 | PHD finger domain protein OS=Aspergillus<br>niger OX=5061 GN=ABL_07072 PE=3 SV=1                                                                                                                            | 2  | 1 |
| 116 | A0A124BWL5 | Phospholipase/carboxylesterase superfamily<br>OS=Aspergillus niger OX=5061<br>GN=ABL_03207 PE=4 SV=1                                                                                                        | 13 | 1 |
| 117 | G3XXP5     | Phospholipid-transporting ATPase<br>OS=Aspergillus niger (strain ATCC 1015 / CBS<br>113.46 / FGSC A1144 / LSHB Ac4 / NCTC<br>3858a / NRRL 328 / USDA 3528.7)<br>OX=380704 GN=ASPNIDRAFT_182985 PE=3<br>SV=1 | 1  | 1 |
| 118 | G3XZA5     | Polarized growth protein Boi2 OS=Aspergillus<br>niger (strain ATCC 1015 / CBS 113.46 / FGSC<br>A1144 / LSHB Ac4 / NCTC 3858a / NRRL 328 /<br>USDA 3528.7) OX=380704<br>GN=ASPNIDRAFT_209479 PE=4 SV=1       | 1  | 1 |
| 119 | A0A117E1C4 | Polyketide synthase P OS=Aspergillus niger<br>OX=5061 GN=ABL_06494 PE=4 SV=1                                                                                                                                | 2  | 1 |
| 120 | A0A370C821 | polynucleotide adenyllyltransferase<br>OS=Aspergillus niger ATCC 13496<br>OX=1353008 GN=M747DRAFT_171340 PE=3                                                                                               | 2  | 1 |

|     |            |                                                                                                                                                                                                           |   |   |
|-----|------------|-----------------------------------------------------------------------------------------------------------------------------------------------------------------------------------------------------------|---|---|
|     |            | SV=1                                                                                                                                                                                                      |   |   |
| 121 | G3Y7J6     | Probable glucan endo-1,3-beta-glucosidase eglC OS=Aspergillus niger (strain ATCC 1015 / CBS 113.46 / FGSC A1144 / LSHB Ac4 / NCTC 3858a / NRRL 328 / USDA 3528.7) OX=380704 GN=ASPNIDRAFT_44517 PE=3 SV=1 | 3 | 1 |
| 122 | A0A100IK34 | Probable vacuolar protein sorting-associated protein 16 homolog OS=Aspergillus niger OX=5061 GN=ABL_05364 PE=3 SV=1                                                                                       | 1 | 1 |
| 123 | A0A117E1S8 | Protein kinase domain-containing protein OS=Aspergillus niger OX=5061 GN=ABL_07156 PE=4 SV=1                                                                                                              | 1 | 1 |
| 124 | A0A319A1X1 | Protein kinase Scy1 OS=Aspergillus lacticoffeatus (strain CBS 101883) OX=1450533 GN=BO96DRAFT_374092 PE=4 SV=1                                                                                            | 3 | 1 |
| 125 | A0A254TYY7 | Putative endo-1, 4-beta-xylanase B domain protein OS=Aspergillus niger OX=5061 GN=ATCC64974_22520 PE=4 SV=1                                                                                               | 7 | 1 |
| 126 | A0A370CDI9 | Putative mitochondria protein Fmp29 OS=Aspergillus niger ATCC 13496 OX=1353008 GN=M747DRAFT_336513 PE=4 SV=1                                                                                              | 5 | 1 |
| 127 | A0A100IDS0 | Proline-5-carboxylate reductase OS=Aspergillus niger OX=5061 GN=ABL_03113 PE=3 SV=1                                                                                                                       | 8 | 1 |
| 128 | A0A254UBC1 | Raptor N-terminal CASPase like domain family protein OS=Aspergillus niger OX=5061 GN=ATCC64974_47480 PE=4 SV=1                                                                                            | 9 | 1 |
| 129 | A0A100IN58 | Related to regulatory protein amdA OS=Aspergillus niger OX=5061 GN=ABL_06592 PE=4 SV=1                                                                                                                    | 4 | 1 |
| 130 | A0A254UE20 | Retinol dehydrogenase 12 OS=Aspergillus niger OX=5061 GN=ATCC64974_26640 PE=4 SV=1                                                                                                                        | 5 | 1 |
| 131 | A0A319AGZ1 | Rho guanyl nucleotide exchange factor OS=Aspergillus lacticoffeatus (strain CBS 101883) OX=1450533 GN=BO96DRAFT_397420 PE=4 SV=1                                                                          | 3 | 1 |
| 132 | A0A117DV89 | Ribosome biogenesis protein OS=Aspergillus niger OX=5061 GN=ABL_00747 PE=4 SV=1                                                                                                                           | 1 | 1 |
| 133 | A0A370CFT5 | RING finger domain protein OS=Aspergillus niger ATCC 13496 OX=1353008 GN=M747DRAFT_301143 PE=4 SV=1                                                                                                       | 5 | 1 |
| 134 | A0A370BZ11 | RraA-like protein OS=Aspergillus niger ATCC 13496 OX=1353008 GN=M747DRAFT_238911 PE=4 SV=1                                                                                                                | 3 | 1 |
| 135 | A0A505IGI7 | rRNA processing/ribosome biogenesis family protein OS=Aspergillus niger OX=5061 GN=CAN33_0036120 PE=3 SV=1                                                                                                | 1 | 1 |
| 136 | A0A100I4A7 | RTA1 domain protein OS=Aspergillus niger                                                                                                                                                                  | 7 | 1 |

|     |            |                                                                                                                                          |    |   |
|-----|------------|------------------------------------------------------------------------------------------------------------------------------------------|----|---|
|     |            | OX=5061 GN=ABL_00705 PE=4 SV=1                                                                                                           |    |   |
| 137 | A0A370CBS1 | SEC7 domain-containing protein<br>OS=Aspergillus niger ATCC 13496<br>OX=1353008 GN=M747DRAFT_154736 PE=4<br>SV=1                         | 2  | 1 |
| 138 | A0A100I343 | Secretion pathway protein Sls2/Rcy1<br>OS=Aspergillus niger OX=5061<br>GN=ABL_00381 PE=4 SV=1                                            | 3  | 1 |
| 139 | A0A370CG90 | Serine/threonine-protein kinase Tel1<br>OS=Aspergillus niger ATCC 13496<br>OX=1353008 GN=M747DRAFT_365830 PE=3<br>SV=1                   | 1  | 1 |
| 140 | A0A100IUG8 | Short-chain dehydrogenase/reductase family<br>protein OS=Aspergillus niger OX=5061<br>GN=ABL_10235 PE=4 SV=1                             | 8  | 1 |
| 141 | A0A100IRB0 | Similar to alanine racemase domain protein<br>OS=Aspergillus niger OX=5061<br>GN=ABL_08575 PE=3 SV=1                                     | 5  | 1 |
| 142 | A0A100I7L7 | Similar to An01g11830 OS=Aspergillus niger<br>OX=5061 GN=ABL_01534 PE=4 SV=1                                                             | 5  | 1 |
| 143 | A0A100I8R1 | Similar to An02g09040 OS=Aspergillus niger<br>OX=5061 GN=ABL_01827 PE=4 SV=1                                                             | 5  | 1 |
| 144 | A0A100I8R3 | Similar to An02g09290 OS=Aspergillus niger<br>OX=5061 GN=ABL_01848 PE=4 SV=1                                                             | 5  | 1 |
| 145 | A0A100IBH3 | Similar to An04g07160 OS=Aspergillus niger<br>OX=5061 GN=ABL_02535 PE=4 SV=1                                                             | 8  | 1 |
| 146 | A0A100IDW3 | Similar to An07g04590 OS=Aspergillus niger<br>OX=5061 GN=ABL_03147 PE=4 SV=1                                                             | 1  | 1 |
| 147 | A0A100INV3 | Similar to An11g09480 OS=Aspergillus niger<br>OX=5061 GN=ABL_07314 PE=4 SV=1                                                             | 16 | 1 |
| 148 | A0A100IKK4 | Similar to An14g01950 OS=Aspergillus niger<br>OX=5061 GN=ABL_05603 PE=4 SV=1                                                             | 9  | 1 |
| 149 | A0A117DZ24 | Similar to An15g05930 OS=Aspergillus niger<br>OX=5061 GN=ABL_03604 PE=4 SV=1                                                             | 25 | 1 |
| 150 | A0A319A4R6 | Similar to OS=Aspergillus lacticoffeatus<br>(strain CBS 101883) OX=1450533<br>GN=BO96DRAFT_425271 PE=4 SV=1                              | 10 | 1 |
| 151 | A0A100ICIO | Similar to OS=Aspergillus niger OX=5061<br>GN=ABL_02761 PE=4 SV=1                                                                        | 8  | 1 |
| 152 | A0A319BAR4 | Solid-state culture specific protein<br>OS=Aspergillus lacticoffeatus (strain CBS<br>101883) OX=1450533<br>GN=BO96DRAFT_397855 PE=4 SV=1 | 4  | 1 |
| 153 | A0A319ATM9 | Superoxide dismutase [Cu-Zn] OS=Aspergillus<br>lacticoffeatus (strain CBS 101883)<br>OX=1450533 GN=BO96DRAFT_495966 PE=3<br>SV=1         | 6  | 1 |
| 154 | A2R622     | T-complex protein 1 subunit alpha<br>OS=Aspergillus niger (strain CBS 513.88 /<br>FGSC A1513) OX=425011 GN=An15g06370<br>PE=3 SV=1       | 5  | 1 |
| 155 | G3Y5R8     | T-complex protein 1 subunit zeta                                                                                                         | 2  | 1 |

|     |            |                                                                                                                                                                |    |   |
|-----|------------|----------------------------------------------------------------------------------------------------------------------------------------------------------------|----|---|
|     |            | OS=Aspergillus niger (strain ATCC 1015 / CBS 113.46 / FGSC A1144 / LSHB Ac4 / NCTC 3858a / NRRL 328 / USDA 3528.7)<br>OX=380704 GN=ASPNIDRAFT_201109 PE=3 SV=1 |    |   |
| 156 | A0A319AS63 | Tetratricopeptide repeat domain protein<br>OS=Aspergillus lacticoffeatus (strain CBS 101883) OX=1450533<br>GN=BO96DRAFT_436346 PE=4 SV=1                       | 2  | 1 |
| 157 | A0A100IDC9 | Thiolase-like protein OS=Aspergillus niger<br>OX=5061 GN=ABL_02716 PE=4 SV=1                                                                                   | 1  | 1 |
| 158 | A0A319AFH4 | Thioredox_DsbH domain-containing protein<br>OS=Aspergillus lacticoffeatus (strain CBS 101883) OX=1450533<br>GN=BO96DRAFT_332328 PE=4 SV=1                      | 2  | 1 |
| 159 | A0A318ZU33 | TPR-like protein OS=Aspergillus lacticoffeatus (strain CBS 101883) OX=1450533<br>GN=BO96DRAFT_353132 PE=4 SV=1                                                 | 2  | 1 |
| 160 | A0A319AME1 | TPR-like protein OS=Aspergillus lacticoffeatus (strain CBS 101883) OX=1450533<br>GN=BO96DRAFT_492219 PE=4 SV=1                                                 | 3  | 1 |
| 161 | A0A319ALC4 | Transcription factor hoxa13 OS=Aspergillus lacticoffeatus (strain CBS 101883)<br>OX=1450533 GN=BO96DRAFT_338958 PE=4 SV=1                                      | 3  | 1 |
| 162 | A0A117DW75 | Transcription factor TFIIA complex subunit Toa1 OS=Aspergillus niger OX=5061<br>GN=ABL_01455 PE=3 SV=1                                                         | 9  | 1 |
| 163 | A0A124BVE9 | tRNA wybutosine-synthesizing protein 4<br>OS=Aspergillus niger OX=5061<br>GN=ABL_01386 PE=4 SV=1                                                               | 4  | 1 |
| 164 | A0A319BDK2 | type II protein arginine methyltransferase<br>OS=Aspergillus lacticoffeatus (strain CBS 101883) OX=1450533<br>GN=BO96DRAFT_453273 PE=3 SV=1                    | 2  | 1 |
| 165 | A0A505IBB1 | U3 snoRNA associated family protein<br>OS=Aspergillus niger OX=5061<br>GN=CAN33_008050 PE=4 SV=1                                                               | 5  | 1 |
| 166 | A0A319C263 | Uncharacterized protein OS=Aspergillus lacticoffeatus (strain CBS 101883)<br>OX=1450533 GN=BO96DRAFT_496195 PE=4 SV=1                                          | 2  | 1 |
| 167 | A2QBQ4     | Uncharacterized protein OS=Aspergillus niger (strain CBS 513.88 / FGSC A1513) OX=425011<br>GN=An02g00860 PE=4 SV=1                                             | 6  | 1 |
| 168 | A2QC66     | Uncharacterized protein OS=Aspergillus niger (strain CBS 513.88 / FGSC A1513) OX=425011<br>GN=An02g02450 PE=4 SV=1                                             | 3  | 1 |
| 169 | A2QIV1     | Uncharacterized protein OS=Aspergillus niger (strain CBS 513.88 / FGSC A1513) OX=425011<br>GN=An04g04830 PE=4 SV=1                                             | 46 | 1 |
| 170 | A2QX72     | Uncharacterized protein OS=Aspergillus niger                                                                                                                   | 7  | 1 |

|     |            |                                                                                                                                                                                                      |    |   |
|-----|------------|------------------------------------------------------------------------------------------------------------------------------------------------------------------------------------------------------|----|---|
|     |            | (strain CBS 513.88 / FGSC A1513) OX=425011<br>GN=An11g07870 PE=4 SV=1                                                                                                                                |    |   |
| 171 | A0A370C924 | Uncharacterized protein OS=Aspergillus niger<br>ATCC 13496 OX=1353008<br>GN=M747DRAFT_293410 PE=4 SV=1                                                                                               | 4  | 1 |
| 172 | A0A370C9G4 | Uncharacterized protein OS=Aspergillus niger<br>ATCC 13496 OX=1353008<br>GN=M747DRAFT_294057 PE=4 SV=1                                                                                               | 7  | 1 |
| 173 | A0A100IL12 | Unnamed protein product OS=Aspergillus<br>niger OX=5061 GN=ABL_05820 PE=3 SV=1                                                                                                                       | 6  | 1 |
| 174 | A0A124BXQ9 | Unnamed protein product OS=Aspergillus<br>niger OX=5061 GN=ABL_05838 PE=4 SV=1                                                                                                                       | 5  | 1 |
| 175 | A0A100IS93 | Unnamed protein product OS=Aspergillus<br>niger OX=5061 GN=ABL_08842 PE=3 SV=1                                                                                                                       | 3  | 1 |
| 176 | A0A124BYV6 | Unnamed protein product OS=Aspergillus<br>niger OX=5061 GN=ABL_09407 PE=4 SV=1                                                                                                                       | 1  | 1 |
| 177 | A0A100IU45 | Unnamed protein product OS=Aspergillus<br>niger OX=5061 GN=ABL_10000 PE=4 SV=1                                                                                                                       | 7  | 1 |
| 178 | A0A100IUI7 | Unnamed protein product OS=Aspergillus<br>niger OX=5061 GN=ABL_10258 PE=4 SV=1                                                                                                                       | 9  | 1 |
| 179 | A0A117E491 | Unnamed protein product OS=Aspergillus<br>niger OX=5061 GN=ABL_10276 PE=4 SV=1                                                                                                                       | 2  | 1 |
| 180 | G3Y0X4     | Vacuolar segregation protein OS=Aspergillus<br>niger (strain ATCC 1015 / CBS 113.46 / FGSC<br>A1144 / LSHB Ac4 / NCTC 3858a / NRRL 328 /<br>USDA 3528.7) OX=380704<br>GN=ASPNIDRAFT_207173 PE=4 SV=1 | 1  | 1 |
| 181 | A0A100IKN8 | Vegetative cell wall protein gp1<br>OS=Aspergillus niger OX=5061<br>GN=ABL_05301 PE=4 SV=1                                                                                                           | 10 | 1 |
| 182 | A0A100IJN2 | VHS domain protein OS=Aspergillus niger<br>OX=5061 GN=ABL_05127 PE=4 SV=1                                                                                                                            | 8  | 1 |
| 183 | A0A124BXS5 | WD domain containing protein<br>OS=Aspergillus niger OX=5061<br>GN=ABL_05972 PE=4 SV=1                                                                                                               | 3  | 1 |
| 184 | A0A318ZVS9 | WD domain protein OS=Aspergillus<br>lacticoffeatus (strain CBS 101883)<br>OX=1450533 GN=BO96DRAFT_427533 PE=4<br>SV=1                                                                                | 5  | 1 |
| 185 | A0A117DV01 | Zinc knuckle transcription factor<br>OS=Aspergillus niger OX=5061<br>GN=ABL_00565 PE=4 SV=1                                                                                                          | 1  | 1 |
| 186 | A0A254TW09 | Zinc-binding dehydrogenase family protein<br>OS=Aspergillus niger OX=5061<br>GN=ATCC64974_52450 PE=4 SV=1                                                                                            | 3  | 1 |
| 187 | A0A370C4R8 | Zn(2)-C6 fungal-type domain-containing<br>protein OS=Aspergillus niger ATCC 13496<br>OX=1353008 GN=M747DRAFT_26933 PE=4<br>SV=1                                                                      | 9  | 1 |
| 188 | A0A100I4L5 | Zn(2)-C6 fungal-type domain-containing<br>protein OS=Aspergillus niger OX=5061<br>GN=ABL_00793 PE=4 SV=1                                                                                             | 6  | 1 |

|     |            |                                                                                                                                     |   |   |
|-----|------------|-------------------------------------------------------------------------------------------------------------------------------------|---|---|
| 189 | A0A319A7T1 | Zn(II)2Cys6 transcription factor<br>OS=Aspergillus laticoffeatus (strain CBS<br>101883) OX=1450533<br>GN=BO96DRAFT_136839 PE=4 SV=1 | 3 | 1 |
|-----|------------|-------------------------------------------------------------------------------------------------------------------------------------|---|---|

OS = Organism Name; OX = Organism Identifier; GN = Gene Name; PE = Protein Existence; SV = Sequence Version.

**Table S2.** Proteome of *Aspergillus versicolor* following 1 mM Zn challenge.

| #  | Accession  | Description                                                                                                                      | Coverage [%] | # Peptides |
|----|------------|----------------------------------------------------------------------------------------------------------------------------------|--------------|------------|
| 1  | A0A1L9PMT1 | 3-ketosteroid reductase OS=Aspergillus versicolor CBS 583.65 OX=1036611 GN=ASPVEDRAFT_132993 PE=4 SV=1                           | 2            | 1          |
| 2  | A0A1L9PRL7 | 3-oxoacid CoA-transferase OS=Aspergillus versicolor CBS 583.65 OX=1036611 GN=ASPVEDRAFT_63628 PE=3 SV=1                          | 5            | 2          |
| 3  | A0A1L9PYK9 | Abhydrolase_4 domain-containing protein OS=Aspergillus versicolor CBS 583.65 OX=1036611 GN=ASPVEDRAFT_32920 PE=4 SV=1            | 14           | 1          |
| 4  | A0A1L9PUZ2 | Actin cytoskeleton-regulatory complex protein PAN1 OS=Aspergillus versicolor CBS 583.65 OX=1036611 GN=ASPVEDRAFT_55278 PE=3 SV=1 | 1            | 1          |
| 5  | A0A1L9PI02 | ANK_REP_REGION domain-containing protein OS=Aspergillus versicolor CBS 583.65 OX=1036611 GN=ASPVEDRAFT_40727 PE=4 SV=1           | 4            | 1          |
| 6  | A0A1L9PEG7 | AT DNA binding protein OS=Aspergillus versicolor CBS 583.65 OX=1036611 GN=ASPVEDRAFT_127334 PE=4 SV=1                            | 1            | 1          |
| 7  | A0A1L9P4F3 | ATP-dependent Clp protease OS=Aspergillus versicolor CBS 583.65 OX=1036611 GN=ASPVEDRAFT_23400 PE=4 SV=1                         | 4            | 1          |
| 8  | A0A1L9PZX6 | Cell pattern formation-associated protein stuA OS=Aspergillus versicolor CBS 583.65 OX=1036611 GN=ASPVEDRAFT_56565 PE=4 SV=1     | 4            | 1          |
| 9  | A0A1L9PM18 | CRAL-TRIO domain-containing protein OS=Aspergillus versicolor CBS 583.65 OX=1036611 GN=ASPVEDRAFT_683286 PE=4 SV=1               | 3            | 1          |
| 10 | A0A1L9P378 | CULLIN_2 domain-containing protein OS=Aspergillus versicolor CBS 583.65 OX=1036611 GN=ASPVEDRAFT_48278 PE=3 SV=1                 | 1            | 1          |
| 11 | A0A1L9PBX4 | Cytochrome P450 OS=Aspergillus versicolor CBS 583.65 OX=1036611 GN=ASPVEDRAFT_50570 PE=3 SV=1                                    | 4            | 1          |
| 12 | A0A1L9P543 | Double-strand break repair protein OS=Aspergillus versicolor CBS 583.65 OX=1036611 GN=ASPVEDRAFT_182449 PE=3 SV=1                | 3            | 1          |
| 13 | A0A1L9P7S5 | EHN domain-containing protein OS=Aspergillus versicolor CBS 583.65 OX=1036611 GN=ASPVEDRAFT_59247 PE=3 SV=1                      | 3            | 1          |

|    |            |                                                                                                                                         |   |   |
|----|------------|-----------------------------------------------------------------------------------------------------------------------------------------|---|---|
| 14 | A0A1L9P7A6 | Elongation factor 1-beta<br>OS=Aspergillus versicolor CBS 583.65<br>OX=1036611 GN=ASPVEDRAFT_36821<br>PE=3 SV=1                         | 9 | 1 |
| 15 | A0A1L9Q041 | FAD_binding_3 domain-containing<br>protein OS=Aspergillus versicolor CBS<br>583.65 OX=1036611<br>GN=ASPVEDRAFT_201722 PE=4 SV=1         | 3 | 1 |
| 16 | A0A1L9PXR6 | FAD-binding PCMH-type domain-<br>containing protein OS=Aspergillus<br>versicolor CBS 583.65 OX=1036611<br>GN=ASPVEDRAFT_32615 PE=3 SV=1 | 4 | 1 |
| 17 | A0A1L9Q0H0 | FAD-binding PCMH-type domain-<br>containing protein OS=Aspergillus<br>versicolor CBS 583.65 OX=1036611<br>GN=ASPVEDRAFT_56697 PE=4 SV=1 | 3 | 1 |
| 18 | A0A1L9PHA0 | Fatty acid synthase subunit alpha<br>OS=Aspergillus versicolor CBS 583.65<br>OX=1036611 GN=ASPVEDRAFT_593098<br>PE=3 SV=1               | 2 | 2 |
| 19 | A0A1L9PYD8 | Fungal_trans domain-containing<br>protein OS=Aspergillus versicolor CBS<br>583.65 OX=1036611<br>GN=ASPVEDRAFT_87828 PE=4 SV=1           | 5 | 1 |
| 20 | A0A1L9PQJ6 | G-patch domain-containing protein<br>OS=Aspergillus versicolor CBS 583.65<br>OX=1036611 GN=ASPVEDRAFT_133656<br>PE=4 SV=1               | 6 | 1 |
| 21 | A0A1L9Q109 | Glycos_transf_1 domain-containing<br>protein OS=Aspergillus versicolor CBS<br>583.65 OX=1036611<br>GN=ASPVEDRAFT_46734 PE=4 SV=1        | 1 | 1 |
| 22 | A0A1L9P6X7 | Gmp synthase OS=Aspergillus<br>versicolor CBS 583.65 OX=1036611<br>GN=ASPVEDRAFT_277587 PE=4 SV=1                                       | 8 | 1 |
| 23 | A0A1L9PAC7 | Helicase C-terminal domain-containing<br>protein OS=Aspergillus versicolor CBS<br>583.65 OX=1036611<br>GN=ASPVEDRAFT_161747 PE=4 SV=1   | 2 | 1 |
| 24 | A0A1L9PNN3 | HET domain-containing protein<br>OS=Aspergillus versicolor CBS 583.65<br>OX=1036611 GN=ASPVEDRAFT_42645<br>PE=4 SV=1                    | 3 | 1 |
| 25 | A0A1L9PSL1 | histone acetyltransferase<br>OS=Aspergillus versicolor CBS 583.65<br>OX=1036611 GN=ASPVEDRAFT_54661<br>PE=3 SV=1                        | 1 | 1 |
| 26 | A0A1L9PA07 | hydroxyacid-oxoacid transhydrogenase<br>OS=Aspergillus versicolor CBS 583.65<br>OX=1036611 GN=ASPVEDRAFT_124745<br>PE=3 SV=1            | 3 | 1 |
| 27 | A0A1L9PB22 | Importin N-terminal domain-containing                                                                                                   | 2 | 1 |



|    |            |                                                                                                                                          |    |   |
|----|------------|------------------------------------------------------------------------------------------------------------------------------------------|----|---|
|    |            | protein OS=Aspergillus versicolor CBS 583.65 OX=1036611<br>GN=ASPVEDRAFT_38167 PE=4 SV=1                                                 |    |   |
| 28 | A0A1L9PHK9 | J domain-containing protein<br>OS=Aspergillus versicolor CBS 583.65<br>OX=1036611 GN=ASPVEDRAFT_40513<br>PE=4 SV=1                       | 3  | 1 |
| 29 | A0A1L9PTS2 | Magnesium transporter OS=Aspergillus<br>versicolor CBS 583.65 OX=1036611<br>GN=ASPVEDRAFT_44450 PE=3 SV=1                                | 5  | 1 |
| 30 | A0A1L9PPK9 | MFS domain-containing protein<br>OS=Aspergillus versicolor CBS 583.65<br>OX=1036611 GN=ASPVEDRAFT_134352<br>PE=4 SV=1                    | 2  | 1 |
| 31 | A0A1L9Q1B0 | MFS domain-containing protein<br>OS=Aspergillus versicolor CBS 583.65<br>OX=1036611 GN=ASPVEDRAFT_370275<br>PE=4 SV=1                    | 4  | 1 |
| 32 | A0A1L9Q5E2 | MFS domain-containing protein<br>OS=Aspergillus versicolor CBS 583.65<br>OX=1036611 GN=ASPVEDRAFT_48072<br>PE=4 SV=1                     | 7  | 1 |
| 33 | A0A1L9P4E8 | MYB family conidiophore development<br>protein F1bD OS=Aspergillus versicolor<br>CBS 583.65 OX=1036611<br>GN=ASPVEDRAFT_157666 PE=4 SV=1 | 5  | 1 |
| 34 | A0A1L9P463 | MYND-type zinc finger protein samB<br>OS=Aspergillus versicolor CBS 583.65<br>OX=1036611 GN=ASPVEDRAFT_231328<br>PE=3 SV=1               | 7  | 2 |
| 35 | A0A1L9PB84 | NAD(P)-binding protein OS=Aspergillus<br>versicolor CBS 583.65 OX=1036611<br>GN=ASPVEDRAFT_147977 PE=4 SV=1                              | 10 | 1 |
| 36 | A0A1L9PUT3 | NAD(P)-binding protein OS=Aspergillus<br>versicolor CBS 583.65 OX=1036611<br>GN=ASPVEDRAFT_55240 PE=3 SV=1                               | 10 | 1 |
| 37 | A0A1L9PZW1 | Nucleoporin POM33 OS=Aspergillus<br>versicolor CBS 583.65 OX=1036611<br>GN=ASPVEDRAFT_354776 PE=3 SV=1                                   | 8  | 1 |
| 38 | A0A1L9PVH6 | Oxidoreductase OS=Aspergillus<br>versicolor CBS 583.65 OX=1036611<br>GN=ASPVEDRAFT_86892 PE=4 SV=1                                       | 9  | 1 |
| 39 | A0A1L9PHE0 | Piwi domain-containing protein<br>OS=Aspergillus versicolor CBS 583.65<br>OX=1036611 GN=ASPVEDRAFT_82417<br>PE=4 SV=1                    | 2  | 1 |
| 40 | A0A1L9P620 | PKS_ER domain-containing protein<br>OS=Aspergillus versicolor CBS 583.65<br>OX=1036611 GN=ASPVEDRAFT_183056<br>PE=3 SV=1                 | 10 | 1 |
| 41 | A0A1L9P4I2 | Plasma membrane ATPase<br>OS=Aspergillus versicolor CBS 583.65                                                                           | 2  | 1 |

|    |            |                                                                                                                                              |    |   |
|----|------------|----------------------------------------------------------------------------------------------------------------------------------------------|----|---|
|    |            | OX=1036611 GN=ASPVEDRAFT_35829<br>PE=3 SV=1                                                                                                  |    |   |
| 42 | A0A1L9PN34 | PNK3P-domain-containing protein<br>OS=Aspergillus versicolor CBS 583.65<br>OX=1036611 GN=ASPVEDRAFT_42469<br>PE=4 SV=1                       | 5  | 1 |
| 43 | A0A1L9P7X2 | Pre-mRNA splicing factor clf1<br>OS=Aspergillus versicolor CBS 583.65<br>OX=1036611 GN=ASPVEDRAFT_120958<br>PE=4 SV=1                        | 4  | 1 |
| 44 | A0A1L9PN68 | Proteasome component OS=Aspergillus<br>versicolor CBS 583.65 OX=1036611<br>GN=ASPVEDRAFT_72741 PE=4 SV=1                                     | 1  | 1 |
| 45 | A0A1L9PQE3 | Protein ecm33 OS=Aspergillus<br>versicolor CBS 583.65 OX=1036611<br>GN=ASPVEDRAFT_133806 PE=4 SV=1                                           | 6  | 1 |
| 46 | A0A1L9PJ13 | Rad4 transglutaminase-like domain-<br>containing protein OS=Aspergillus<br>versicolor CBS 583.65 OX=1036611<br>GN=ASPVEDRAFT_41066 PE=3 SV=1 | 4  | 1 |
| 47 | A0A1L9P806 | RNA polymerase-associated protein<br>LEO1 OS=Aspergillus versicolor CBS<br>583.65 OX=1036611<br>GN=ASPVEDRAFT_122579 PE=4 SV=1               | 4  | 1 |
| 48 | A0A1L9PEM7 | Similar to OS=Aspergillus versicolor CBS<br>583.65 OX=1036611<br>GN=ASPVEDRAFT_51191 PE=4 SV=1                                               | 5  | 1 |
| 49 | A0A1L9PMB1 | Spindle pole body component alp14<br>OS=Aspergillus versicolor CBS 583.65<br>OX=1036611 GN=ASPVEDRAFT_131415<br>PE=4 SV=1                    | 2  | 1 |
| 50 | A0A1L9PIR4 | Threonylcarbamoyl-AMP synthase<br>OS=Aspergillus versicolor CBS 583.65<br>OX=1036611 GN=ASPVEDRAFT_52330<br>PE=3 SV=1                        | 2  | 1 |
| 51 | A0A1L9P6M2 | tRNA-dihydrouridine(47) synthase<br>[NAD(P)(+)] OS=Aspergillus versicolor<br>CBS 583.65 OX=1036611<br>GN=ASPVEDRAFT_24145 PE=3 SV=1          | 3  | 1 |
| 52 | A0A1L9Q280 | Uncharacterized protein<br>OS=Aspergillus versicolor CBS 583.65<br>OX=1036611 GN=ASPVEDRAFT_47078<br>PE=4 SV=1                               | 13 | 1 |
| 53 | A0A1L9Q453 | Zn(2)-C6 fungal-type domain-<br>containing protein OS=Aspergillus<br>versicolor CBS 583.65 OX=1036611<br>GN=ASPVEDRAFT_57603 PE=4 SV=1       | 5  | 1 |

OS = Organism Name; OX = Organism Identifier; GN = Gene Name; PE = Protein Existence; SV = Sequence Version.

**Table S3.** Proteome of *Cladosporium cladosporioides* following 1 mM Zn challenge.

| # | Accession  | Description                                                                                                       | Coverage [%] | # Peptides |
|---|------------|-------------------------------------------------------------------------------------------------------------------|--------------|------------|
| 1 | A0A0Y0M151 | Highly reducing polyketide synthase<br>cla2 OS=Cladosporium cladosporioides<br>OX=29917 GN=cla2 PE=1 SV=1         | 2            | 2          |
| 2 | A8C2B6     | Histone H3 (Fragment)<br>OS=Cladosporium aff. cladosporioides<br>CBS 673.69 OX=470196 PE=3 SV=1                   | 28           | 1          |
| 3 | A0A076JS36 | Methyltransferase domain-containing<br>protein OS=Cladosporium<br>cladosporioides virus 1 OX=1529605<br>PE=4 SV=1 | 6            | 1          |
| 4 | G9FT48     | Polyketide synthase (Fragment)<br>OS=Cladosporium cladosporioides<br>OX=29917 GN=pks1 PE=4 SV=1                   | 28           | 2          |
| 5 | A0A0X8DS88 | Putative glycoside hydrolase<br>OS=Cladosporium cladosporioides<br>OX=29917 PE=2 SV=1                             | 5            | 1          |
| 6 | A0A076JYE6 | Putative RNA-dependent RNA<br>polymerase OS=Cladosporium<br>cladosporioides virus 1 OX=1529605<br>PE=4 SV=1       | 1            | 1          |
| 7 | B0L807     | Vacuolar serine protease (Fragment)<br>OS=Cladosporium cladosporioides<br>OX=29917 PE=2 SV=1                      | 6            | 1          |

OS = Organism Name; OX = Organism Identifier; GN = Gene Name; PE = Protein Existence; SV = Sequence Version.

**Table S4.** Proteome of *Paecilomyces variotii* following 1 mM Zn challenge.

| #  | Accession  | Description                                                                                                                                 | Coverage [%] | # Peptides |
|----|------------|---------------------------------------------------------------------------------------------------------------------------------------------|--------------|------------|
| 1  | A0A443HXN1 | Acetyl-CoA carboxylase<br>OS=Byssoschlamys spectabilis<br>OX=264951 GN=C8Q69DRAFT_526400<br>PE=4 SV=1                                       | 0            | 1          |
| 2  | V5FU02     | Acyl-CoA thioester hydrolase<br>OS=Byssoschlamys spectabilis (strain<br>No. 5 / NBRC 109023) OX=1356009<br>GN=PVAR5_4171 PE=4 SV=1          | 3            | 1          |
| 3  | A0A443HP93 | Acyl-CoA thioesterase<br>OS=Byssoschlamys spectabilis<br>OX=264951 GN=C8Q69DRAFT_474121<br>PE=3 SV=1                                        | 10           | 1          |
| 4  | A0A443I5L1 | ADP-ribose 1''-phosphate phosphatase<br>OS=Byssoschlamys spectabilis<br>OX=264951 GN=C8Q69DRAFT_425998<br>PE=3 SV=1                         | 8            | 1          |
| 5  | A0A443HMS9 | ADP-ribosylation factor GTPase-<br>activating protein OS=Byssoschlamys<br>spectabilis OX=264951<br>GN=C8Q69DRAFT_59829 PE=4 SV=1            | 1            | 1          |
| 6  | A0A443HJL3 | ANK_REP_REGION domain-containing<br>protein OS=Byssoschlamys spectabilis<br>OX=264951 GN=C8Q69DRAFT_448048<br>PE=4 SV=1                     | 1            | 1          |
| 7  | V5HW50     | Aspartokinase OS=Byssoschlamys<br>spectabilis (strain No. 5 / NBRC<br>109023) OX=1356009 GN=PVAR5_2605<br>PE=3 SV=1                         | 5            | 1          |
| 8  | V5I0P8     | BTB domain and ankyrin repeat protein<br>OS=Byssoschlamys spectabilis (strain<br>No. 5 / NBRC 109023) OX=1356009<br>GN=PVAR5_4744 PE=4 SV=1 | 2            | 1          |
| 9  | V5FM31     | Carboxymethylenebutenolidase<br>OS=Byssoschlamys spectabilis (strain<br>No. 5 / NBRC 109023) OX=1356009<br>GN=PVAR5_1527 PE=3 SV=1          | 1            | 1          |
| 10 | A0A443I8E9 | Carboxypeptidase OS=Byssoschlamys<br>spectabilis OX=264951<br>GN=C8Q69DRAFT_484887 PE=3 SV=1                                                | 3            | 1          |
| 11 | A0A443I3X2 | Cerato-platanin OS=Byssoschlamys<br>spectabilis OX=264951<br>GN=C8Q69DRAFT_183704 PE=3 SV=1                                                 | 10           | 1          |
| 12 | V5FV50     | chitinase OS=Byssoschlamys spectabilis<br>(strain No. 5 / NBRC 109023)<br>OX=1356009 GN=PVAR5_4576 PE=3<br>SV=1                             | 2            | 1          |
| 13 | V5GCB6     | CMGC/CDK/CDK5 protein kinase<br>OS=Byssoschlamys spectabilis (strain<br>No. 5 / NBRC 109023) OX=1356009                                     | 3            | 1          |

|    |            |                                                                                                                                            |   |   |
|----|------------|--------------------------------------------------------------------------------------------------------------------------------------------|---|---|
|    |            | GN=PVAR5_8425 PE=3 SV=1                                                                                                                    |   |   |
| 14 | V5I3X8     | DNA-directed RNA polymerase subunit beta OS=Byssochlamys spectabilis (strain No. 5 / NBRC 109023) OX=1356009 GN=PVAR5_6663 PE=3 SV=1       | 2 | 1 |
| 15 | A0A443HM53 | DUF2088 domain-containing protein OS=Byssochlamys spectabilis OX=264951 GN=C8Q69DRAFT_500729 PE=4 SV=1                                     | 7 | 1 |
| 16 | A0A443HV26 | DUF2236 domain-containing protein OS=Byssochlamys spectabilis OX=264951 GN=C8Q69DRAFT_486643 PE=4 SV=1                                     | 5 | 1 |
| 17 | V5I5G2     | FAD binding domain protein OS=Byssochlamys spectabilis (strain No. 5 / NBRC 109023) OX=1356009 GN=PVAR5_8011 PE=3 SV=1                     | 3 | 1 |
| 18 | V5FW90     | Flavin-nucleotide-binding protein OS=Byssochlamys spectabilis (strain No. 5 / NBRC 109023) OX=1356009 GN=PVAR5_1468 PE=4 SV=1              | 7 | 1 |
| 19 | A0A443HK18 | glutamine--tRNA ligase OS=Byssochlamys spectabilis OX=264951 GN=C8Q69DRAFT_480150 PE=3 SV=1                                                | 2 | 1 |
| 20 | V5G6T2     | Involucrin repeat protein, putative (Fragment) OS=Byssochlamys spectabilis (strain No. 5 / NBRC 109023) OX=1356009 GN=PVAR5_8926 PE=4 SV=1 | 0 | 1 |
| 21 | A0A443HXM7 | Lipa and NB-ARC domain protein OS=Byssochlamys spectabilis OX=264951 GN=C8Q69DRAFT_248774 PE=4 SV=1                                        | 1 | 1 |
| 22 | A0A443I4B5 | Nucleoporin NUP37 OS=Byssochlamys spectabilis OX=264951 GN=C8Q69DRAFT_396353 PE=4 SV=1                                                     | 4 | 1 |
| 23 | V5G4V1     | Oxalate decarboxylase OS=Byssochlamys spectabilis (strain No. 5 / NBRC 109023) OX=1356009 GN=PVAR5_8183 PE=4 SV=1                          | 6 | 1 |
| 24 | A0A443HWF7 | Pentatricopeptide repeat protein OS=Byssochlamys spectabilis OX=264951 GN=C8Q69DRAFT_464253 PE=4 SV=1                                      | 3 | 1 |
| 25 | V5I1X2     | Phosphatidate cytidyltransferase, putative OS=Byssochlamys spectabilis (strain No. 5 / NBRC 109023) OX=1356009 GN=PVAR5_5455 PE=4 SV=1     | 6 | 1 |
| 26 | A0A443HW63 | Phosphatidylinositol 3-kinase VPS34                                                                                                        | 3 | 1 |

|    |            |                                                                                                                                            |    |   |
|----|------------|--------------------------------------------------------------------------------------------------------------------------------------------|----|---|
|    |            | OS=Byssochlamys spectabilis<br>OX=264951 GN=C8Q69DRAFT_230358<br>PE=3 SV=1                                                                 |    |   |
| 27 | A0A443HJC8 | Phosphotransferase enzyme family protein OS=Byssochlamys spectabilis<br>OX=264951 GN=C8Q69DRAFT_501658<br>PE=4 SV=1                        | 4  | 1 |
| 28 | V5FXF2     | Protein kinase domain-containing protein OS=Byssochlamys spectabilis (strain No. 5 / NBRC 109023)<br>OX=1356009 GN=PVAR5_5443 PE=4<br>SV=1 | 2  | 1 |
| 29 | A0A443HMA6 | Protein transport protein SEC22 OS=Byssochlamys spectabilis<br>OX=264951 GN=C8Q69DRAFT_513969<br>PE=3 SV=1                                 | 11 | 1 |
| 30 | A0A443I8H4 | Putative ABC transporter OS=Byssochlamys spectabilis<br>OX=264951 GN=C8Q69DRAFT_513375<br>PE=4 SV=1                                        | 2  | 1 |
| 31 | A0A443HYS5 | Putative ribonuclease P complex subunit Pop1 OS=Byssochlamys spectabilis OX=264951<br>GN=C8Q69DRAFT_461649 PE=4 SV=1                       | 3  | 1 |
| 32 | A0A443HR32 | Putative ubiquitin-conjugating enzyme Ubc6 OS=Byssochlamys spectabilis<br>OX=264951 GN=C8Q69DRAFT_404844<br>PE=4 SV=1                      | 10 | 1 |
| 33 | A0A443HQ17 | SCD domain-containing protein OS=Byssochlamys spectabilis<br>OX=264951 GN=C8Q69DRAFT_472050<br>PE=4 SV=1                                   | 1  | 1 |
| 34 | V5FQ97     | SH3 domain-containing protein OS=Byssochlamys spectabilis (strain No. 5 / NBRC 109023) OX=1356009<br>GN=PVAR5_9000 PE=4 SV=1               | 1  | 1 |
| 35 | V5FJF1     | Shugoshin OS=Byssochlamys spectabilis (strain No. 5 / NBRC 109023)<br>OX=1356009 GN=PVAR5_6657 PE=3<br>SV=1                                | 4  | 1 |
| 36 | A0A443HSQ9 | Small secreted protein OS=Byssochlamys spectabilis<br>OX=264951 GN=C8Q69DRAFT_508163<br>PE=4 SV=1                                          | 21 | 3 |
| 37 | A0A443HXA5 | Spindle pole body component OS=Byssochlamys spectabilis<br>OX=264951 GN=C8Q69DRAFT_431804<br>PE=3 SV=1                                     | 2  | 1 |
| 38 | V5FYX7     | Sugar transporter family protein OS=Byssochlamys spectabilis (strain No. 5 / NBRC 109023) OX=1356009<br>GN=PVAR5_3560 PE=3 SV=1            | 5  | 1 |

|    |            |                                                                                                                     |    |   |
|----|------------|---------------------------------------------------------------------------------------------------------------------|----|---|
| 39 | V5F844     | Terpenoid synthase OS=Byssochlamys spectabilis (strain No. 5 / NBRC 109023) OX=1356009 GN=PVAR5_0620 PE=4 SV=1      | 3  | 1 |
| 40 | A0A443I8M7 | THO complex subunit 2 OS=Byssochlamys spectabilis OX=264951 GN=C8Q69DRAFT_495578 PE=3 SV=1                          | 1  | 1 |
| 41 | V5HTS4     | Uncharacterized protein OS=Byssochlamys spectabilis (strain No. 5 / NBRC 109023) OX=1356009 GN=PVAR5_1539 PE=4 SV=1 | 15 | 1 |
| 42 | V5GDD7     | Uncharacterized protein OS=Byssochlamys spectabilis (strain No. 5 / NBRC 109023) OX=1356009 GN=PVAR5_7640 PE=4 SV=1 | 10 | 1 |
| 43 | A0A443HKJ7 | ZT_dimer domain-containing protein OS=Byssochlamys spectabilis OX=264951 GN=C8Q69DRAFT_94699 PE=4 SV=1              | 6  | 1 |

OS = Organism Name; OX = Organism Identifier; GN = Gene Name; PE = Protein Existence; SV = Sequence Version.

**Table S5.** Proteome of *Penicillium chrysogenum* following 1 mM Zn challenge.

| #  | Accession  | Description                                                                                                                                           | Coverage [%] | # Peptides |
|----|------------|-------------------------------------------------------------------------------------------------------------------------------------------------------|--------------|------------|
| 1  | AOA167T7D6 | Chromatin assembly factor 1 subunit<br>OS=Penicillium chrysogenum OX=5076<br>GN=EN45_065260 PE=4 SV=1                                                 | 4            | 1          |
| 2  | AOA167UIR0 | Chromatin structure-remodeling<br>complex subunit OS=Penicillium<br>chrysogenum OX=5076<br>GN=EN45_079080 PE=4 SV=1                                   | 1            | 1          |
| 3  | AOA167SX13 | Fidgetin-like protein OS=Penicillium<br>chrysogenum OX=5076<br>GN=EN45_062170 PE=4 SV=1                                                               | 4            | 1          |
| 4  | AOA167TPR9 | GPI-anchored cell surface glycoprotein<br>OS=Penicillium chrysogenum OX=5076<br>GN=EN45_070670 PE=4 SV=1                                              | 2            | 1          |
| 5  | AOA167QFB8 | HET domain-containing protein<br>OS=Penicillium chrysogenum OX=5076<br>GN=EN45_088330 PE=4 SV=1                                                       | 3            | 1          |
| 6  | AOA162BDK5 | Interferon-induced GTP-binding<br>protein OS=Penicillium chrysogenum<br>OX=5076 GN=EN45_108450 PE=4 SV=1                                              | 3            | 1          |
| 7  | B6GYS0     | Pc12g01310 protein OS=Penicillium<br>rubens (strain ATCC 28089 / DSM 1075<br>/ NRRL 1951 / Wisconsin 54-1255)<br>OX=500485 GN=Pc12g01310 PE=4<br>SV=1 | 9            | 1          |
| 8  | B6H0V6     | Pc12g03270 protein OS=Penicillium<br>rubens (strain ATCC 28089 / DSM 1075<br>/ NRRL 1951 / Wisconsin 54-1255)<br>OX=500485 GN=Pc12g03270 PE=4<br>SV=1 | 5            | 1          |
| 9  | B6H1E9     | Pc13g02790 protein OS=Penicillium<br>rubens (strain ATCC 28089 / DSM 1075<br>/ NRRL 1951 / Wisconsin 54-1255)<br>OX=500485 GN=Pc13g02790 PE=4<br>SV=1 | 5            | 1          |
| 10 | B6H314     | Pc13g15820 protein OS=Penicillium<br>rubens (strain ATCC 28089 / DSM 1075<br>/ NRRL 1951 / Wisconsin 54-1255)<br>OX=500485 GN=Pc13g15820 PE=3<br>SV=1 | 5            | 1          |
| 11 | B6HDE3     | Pc20g07370 protein OS=Penicillium<br>rubens (strain ATCC 28089 / DSM 1075<br>/ NRRL 1951 / Wisconsin 54-1255)<br>OX=500485 GN=Pc20g07370 PE=4<br>SV=1 | 5            | 1          |
| 12 | B6HGB8     | Pc20g11840 protein OS=Penicillium<br>rubens (strain ATCC 28089 / DSM 1075<br>/ NRRL 1951 / Wisconsin 54-1255)<br>OX=500485 GN=Pc20g11840 PE=4<br>SV=1 | 5            | 1          |



|    |            |                                                                                                                                           |   |   |
|----|------------|-------------------------------------------------------------------------------------------------------------------------------------------|---|---|
| 13 | B6HHI3     | Pc21g05370 protein OS=Penicillium rubens (strain ATCC 28089 / DSM 1075 / NRRL 1951 / Wisconsin 54-1255) OX=500485 GN=Pc21g05370 PE=4 SV=1 | 7 | 1 |
| 14 | B6HKG0     | Pc21g07340 protein OS=Penicillium rubens (strain ATCC 28089 / DSM 1075 / NRRL 1951 / Wisconsin 54-1255) OX=500485 GN=Pc21g07340 PE=4 SV=1 | 9 | 1 |
| 15 | B6HJ37     | Pc21g19250 protein OS=Penicillium rubens (strain ATCC 28089 / DSM 1075 / NRRL 1951 / Wisconsin 54-1255) OX=500485 GN=Pc21g19250 PE=4 SV=1 | 2 | 1 |
| 16 | B6HPZ0     | Pc22g15540 protein OS=Penicillium rubens (strain ATCC 28089 / DSM 1075 / NRRL 1951 / Wisconsin 54-1255) OX=500485 GN=Pc22g15540 PE=4 SV=1 | 4 | 1 |
| 17 | B6HSF4     | Pc22g17300 protein OS=Penicillium rubens (strain ATCC 28089 / DSM 1075 / NRRL 1951 / Wisconsin 54-1255) OX=500485 GN=Pc22g17300 PE=4 SV=1 | 2 | 1 |
| 18 | AOA167SKS7 | Protein NipSnap-like protein OS=Penicillium chrysogenum OX=5076 GN=EN45_058600 PE=3 SV=1                                                  | 2 | 1 |
| 19 | AOA167TKX5 | Putative quinone oxidoreductase OS=Penicillium chrysogenum OX=5076 GN=EN45_069590 PE=4 SV=1                                               | 5 | 1 |
| 20 | AOA167WFH0 | Vacuolar calcium ion transporter OS=Penicillium chrysogenum OX=5076 GN=EN45_017260 PE=3 SV=1                                              | 5 | 1 |

OS = Organism Name; OX = Organism Identifier; GN = Gene Name; PE = Protein Existence; SV = Sequence Version.

**Table S6.** Comparison across five fungal proteomes (like proteins highlighted in yellow).

| Protein Identifier                                                      | <i>Aspergillus niger</i> | <i>Aspergillus versicolor</i> | <i>Cladosporium cladosporioides</i> | <i>Paecilomyces variotii</i> | <i>Penicillium chrysogenum</i> |
|-------------------------------------------------------------------------|--------------------------|-------------------------------|-------------------------------------|------------------------------|--------------------------------|
| 3-isopropylmalate dehydrogenase                                         | X                        |                               |                                     |                              |                                |
| 3-ketosteroid reductase                                                 |                          | X                             |                                     |                              |                                |
| 3-oxoacid CoA-transferase                                               |                          | X                             |                                     |                              |                                |
| 4-hydroxyphenylpyruvate dioxygenase                                     | X                        |                               |                                     |                              |                                |
| 5-methyltetrahydropteroyl-triglutamate-homocysteine S-methyltransferase | X                        |                               |                                     |                              |                                |
| AB hydrolase-1 domain-containing protein                                | X                        |                               |                                     |                              |                                |
| ABC transporter                                                         | X                        |                               |                                     |                              |                                |
| ABC transporter family protein                                          | X                        |                               |                                     |                              |                                |
| Abhydrolase_4 domain-containing protein                                 |                          | X                             |                                     |                              |                                |
| Acetyl-CoA carboxylase                                                  | X                        |                               |                                     | X                            |                                |
| Actin cytoskeleton-regulatory complex protein PAN1                      |                          | X                             |                                     |                              |                                |
| Acyl-CoA thioester hydrolase                                            |                          |                               |                                     | X                            |                                |
| Acyl-CoA thioesterase                                                   |                          |                               |                                     | X                            |                                |
| ADP-ribose 1"-phosphate phosphatase                                     |                          |                               |                                     | X                            |                                |
| ADP-ribosylation factor GTPase-activating protein                       |                          |                               |                                     | X                            |                                |
| Alcohol dehydrogenase                                                   | X                        |                               |                                     |                              |                                |
| Alcohol oxidase                                                         | X                        |                               |                                     |                              |                                |
| Aldo/keto reductase                                                     | X                        |                               |                                     |                              |                                |
| Alpha/beta hydrolase family protein                                     | X                        |                               |                                     |                              |                                |
| Alpha-galactosidase                                                     | X                        |                               |                                     |                              |                                |
| Amidohydrolase family protein                                           | X                        |                               |                                     |                              |                                |
| AMP dependent CoA ligase                                                | X                        |                               |                                     |                              |                                |
| ANK_REP_REGION domain-containing protein                                | X                        | X                             |                                     | X                            |                                |
| Ankyrin repeat-containing protein, putative                             | X                        |                               |                                     |                              |                                |
| APH domain-containing protein                                           | X                        |                               |                                     |                              |                                |
| Aspartokinase                                                           |                          |                               |                                     | X                            |                                |
| AT DNA binding protein                                                  |                          | X                             |                                     |                              |                                |

| <b>Protein Identifier</b>                       | <b><i>Aspergillus niger</i></b> | <b><i>Aspergillus versicolor</i></b> | <b><i>Cladosporium cladosporioides</i></b> | <b><i>Paecilomyces variotii</i></b> | <b><i>Penicillium chrysogenum</i></b> |
|-------------------------------------------------|---------------------------------|--------------------------------------|--------------------------------------------|-------------------------------------|---------------------------------------|
| ATP synthase F1, beta subunit                   | X                               |                                      |                                            |                                     |                                       |
| ATP synthase subunit d, mitochondrial           | X                               |                                      |                                            |                                     |                                       |
| ATP-dependent Clp protease                      |                                 | X                                    |                                            |                                     |                                       |
| ATP-dependent RNA helicase DED1                 | X                               |                                      |                                            |                                     |                                       |
| Beta-glucosidase                                | X                               |                                      |                                            |                                     |                                       |
| BTB domain and ankyrin repeat protein           |                                 |                                      |                                            | X                                   |                                       |
| BZIP domain-containing protein                  | X                               |                                      |                                            |                                     |                                       |
| BZIP-type transcription factor                  | X                               |                                      |                                            |                                     |                                       |
| CAP-Gly domain-containing protein               | X                               |                                      |                                            |                                     |                                       |
| Carboxylic ester hydrolase                      | X                               |                                      |                                            |                                     |                                       |
| Carboxymethylenebutenolidase                    |                                 |                                      |                                            | X                                   |                                       |
| Carboxypeptidase                                |                                 |                                      |                                            | X                                   |                                       |
| Cell pattern formation-associated protein stuA  |                                 | X                                    |                                            |                                     |                                       |
| Cerato-platanin                                 |                                 |                                      |                                            | X                                   |                                       |
| CHAT domain-containing protein                  | X                               |                                      |                                            |                                     |                                       |
| Chitin synthase                                 | X                               |                                      |                                            |                                     |                                       |
| Chitinase                                       |                                 |                                      |                                            | X                                   |                                       |
| Chromatin assembly factor 1 subunit             |                                 |                                      |                                            |                                     |                                       |
| Chromatin structure-remodeling complex subunit  |                                 |                                      |                                            |                                     |                                       |
| Chromatin-remodeling ATPase INO80               | X                               |                                      |                                            |                                     | X                                     |
| CMGC/CDK/CDK5 protein kinase                    |                                 |                                      |                                            | X                                   | X                                     |
| CRAL-TRIO domain-containing protein             |                                 | X                                    |                                            |                                     |                                       |
| CrpH protein                                    | X                               |                                      |                                            |                                     |                                       |
| CULLIN_2 domain-containing protein              |                                 | X                                    |                                            |                                     |                                       |
| Cyclic nucleotide-binding domain family protein | X                               |                                      |                                            |                                     |                                       |
| Cytochrome P450                                 | X                               | X                                    |                                            |                                     |                                       |
| Cytoplasmic protein                             | X                               |                                      |                                            |                                     |                                       |
| D-arabinono-1,4-lactone oxidase                 | X                               |                                      |                                            |                                     |                                       |
| Delta-aminolevulinic acid dehydratase           | X                               |                                      |                                            |                                     |                                       |
| Dihydroxy-acid dehydratase                      | X                               |                                      |                                            |                                     |                                       |
| Dipeptidyl-peptidase V                          | X                               |                                      |                                            |                                     |                                       |

| <b>Protein Identifier</b>                                 | <b><i>Aspergillus niger</i></b> | <b><i>Aspergillus versicolor</i></b> | <b><i>Cladosporium cladosporioides</i></b> | <b><i>Paecilomyces variotii</i></b> | <b><i>Penicillium chrysogenum</i></b> |
|-----------------------------------------------------------|---------------------------------|--------------------------------------|--------------------------------------------|-------------------------------------|---------------------------------------|
| DNA polymerase kappa                                      | X                               |                                      |                                            |                                     |                                       |
| DNA repair protein RAD16                                  | X                               |                                      |                                            |                                     |                                       |
| DNA repair protein Rad50                                  | X                               |                                      |                                            |                                     |                                       |
| DNA-directed RNA polymerase subunit beta                  |                                 |                                      |                                            | X                                   |                                       |
| Dolichyl-phosphate-mannose--protein mannosyltransferase   | X                               |                                      |                                            |                                     |                                       |
| Double-strand break repair protein                        |                                 | X                                    |                                            |                                     |                                       |
| DUF2007 domain-containing protein                         | X                               |                                      |                                            |                                     |                                       |
| DUF2088 domain-containing protein                         |                                 |                                      |                                            | X                                   |                                       |
| DUF2236 domain-containing protein                         |                                 |                                      |                                            | X                                   |                                       |
| Dynein light intermediate chain                           | X                               |                                      |                                            |                                     |                                       |
| E3 ubiquitin protein ligase                               | X                               |                                      |                                            |                                     |                                       |
| Efflux pump antibiotic resistance protein                 | X                               |                                      |                                            |                                     |                                       |
| EHN domain-containing protein                             |                                 | X                                    |                                            |                                     |                                       |
| ELMO domain-containing protein                            | X                               |                                      |                                            |                                     |                                       |
| Elongation factor 1-beta                                  |                                 | X                                    |                                            |                                     |                                       |
| Enoyl-CoA hydratase/isomerase family protein              | X                               |                                      |                                            |                                     |                                       |
| Eukaryotic translation initiation factor 3 subunit A & E  | X                               |                                      |                                            |                                     |                                       |
| FAD binding domain protein                                |                                 |                                      |                                            | X                                   |                                       |
| FAD_binding_3 domain-containing protein                   | X                               | X                                    |                                            |                                     |                                       |
| FAD-binding PCMH-type domain-containing protein           |                                 | X                                    |                                            |                                     |                                       |
| Fatty acid synthase                                       | X                               | X                                    |                                            |                                     |                                       |
| Fidgetin-like protein                                     |                                 |                                      |                                            |                                     |                                       |
| Flavin containing amine oxidoreductase family protein     | X                               |                                      |                                            |                                     |                                       |
| Flavin-nucleotide-binding protein                         |                                 |                                      |                                            | X                                   | X                                     |
| FSH1 domain-containing protein                            | X                               |                                      |                                            |                                     |                                       |
| Fungal trans domain-containing protein                    | X                               | X                                    |                                            |                                     |                                       |
| G_Protein_Recep_F2_4 domain-containing protein (Fragment) | X                               |                                      |                                            |                                     |                                       |
| General substrate transporter                             | X                               |                                      |                                            |                                     |                                       |

| Protein Identifier                                     | <i>Aspergillus niger</i> | <i>Aspergillus versicolor</i> | <i>Cladosporium cladosporioides</i> | <i>Paecilomyces variotii</i> | <i>Penicillium chrysogenum</i> |
|--------------------------------------------------------|--------------------------|-------------------------------|-------------------------------------|------------------------------|--------------------------------|
| Glutamine synthetase/guanido kinase                    | X                        |                               |                                     |                              |                                |
| Glutamine--tRNA ligase                                 |                          |                               |                                     | X                            |                                |
| Glycogen debranching enzyme Gdb1                       | X                        |                               |                                     |                              |                                |
| Glycos_transf_1 domain-containing protein              | X                        | X                             |                                     |                              |                                |
| Glycosidase                                            | X                        |                               |                                     |                              |                                |
| GMP synthase                                           |                          | X                             |                                     |                              |                                |
| G-patch domain-containing protein                      |                          | X                             |                                     |                              |                                |
| GPI-anchored cell surface glycoprotein                 |                          |                               |                                     |                              |                                |
| GTP-binding protein Obg                                | X                        |                               |                                     |                              |                                |
| HEAT repeat protein                                    | X                        |                               |                                     |                              | X                              |
| Helicase C-terminal domain-containing protein          |                          | X                             |                                     |                              |                                |
| HET domain-containing protein                          | X                        | X                             |                                     |                              |                                |
| Highly reducing polyketide synthase cla2               |                          |                               | X                                   |                              |                                |
| Histone acetyltransferase                              |                          | X                             |                                     |                              |                                |
| Histone H3 (Fragment)                                  |                          |                               | X                                   |                              | X                              |
| Hydroxyacid-oxoacid transhydrogenase                   |                          | X                             |                                     |                              |                                |
| Importin N-terminal domain-containing protein          |                          | X                             |                                     |                              |                                |
| Interferon-induced GTP-binding protein                 |                          |                               |                                     |                              |                                |
| Involucrin repeat protein, putative (Fragment)         |                          |                               |                                     | X                            |                                |
| IPT/TIG domain-containing protein                      | X                        |                               |                                     |                              | X                              |
| J domain-containing protein                            |                          | X                             |                                     |                              |                                |
| Ketosynthase (Fragment)                                | X                        |                               |                                     |                              |                                |
| Kinase-like protein (Fragment)                         | X                        |                               |                                     |                              |                                |
| Kinesin-like protein                                   | X                        |                               |                                     |                              |                                |
| Lipa and NB-ARC domain protein                         |                          |                               |                                     | X                            |                                |
| Magnesium transporter                                  |                          | X                             |                                     |                              |                                |
| Mediator of RNA polymerase II transcription subunit 12 | X                        |                               |                                     |                              |                                |
| MesA                                                   | X                        |                               |                                     |                              |                                |
| Metallo-dependent hydrolase                            | X                        |                               |                                     |                              |                                |

| Protein Identifier                                                       | <i>Aspergillus niger</i> | <i>Aspergillus versicolor</i> | <i>Cladosporium cladosporioides</i> | <i>Paecilomyces variotii</i> | <i>Penicillium chrysogenum</i> |
|--------------------------------------------------------------------------|--------------------------|-------------------------------|-------------------------------------|------------------------------|--------------------------------|
| Methyltransferase domain-containing protein                              |                          |                               | X                                   |                              |                                |
| MFS domain-containing protein                                            | X                        | X                             |                                     |                              |                                |
| MFS general substrate transporter                                        | X                        |                               |                                     |                              |                                |
| MFS monosaccharide transporter                                           | X                        |                               |                                     |                              |                                |
| MFS transporter                                                          | X                        |                               |                                     |                              |                                |
| Mitochondrial 54S ribosomal protein YmL24/YmL14                          | X                        |                               |                                     |                              |                                |
| Mitochondrial thiamine pyrophosphate carrier 1                           | X                        |                               |                                     |                              |                                |
| MYB family conidiophore development protein FlbD                         |                          | X                             |                                     |                              |                                |
| MYND-type zinc finger protein samB                                       |                          | X                             |                                     |                              |                                |
| N2,N2-dimethylguanosine tRNA methyltransferase                           | X                        |                               |                                     |                              |                                |
| N-acetyltransferase complex ARD1 subunit                                 | X                        |                               |                                     |                              |                                |
| NAD(P)-binding protein                                                   | X                        | X                             |                                     |                              |                                |
| NB-ARC domain-containing protein                                         | X                        |                               |                                     |                              |                                |
| Ntox15 domain-containing protein                                         | X                        |                               |                                     |                              |                                |
| Nuclear condensin complex subunit 3                                      | X                        |                               |                                     |                              |                                |
| Nuclear protein export protein Yrb2                                      | X                        |                               |                                     |                              |                                |
| Nuclear RNA binding protein                                              | X                        |                               |                                     |                              |                                |
| Nucleolar protein 12                                                     | X                        |                               |                                     |                              |                                |
| Nucleoporin NUP37                                                        |                          |                               |                                     | X                            |                                |
| Nucleoporin POM33                                                        |                          | X                             |                                     |                              |                                |
| Oxalate decarboxylase                                                    |                          |                               |                                     | X                            |                                |
| Oxidoreductase                                                           |                          | X                             |                                     |                              |                                |
| Oxoglutarate dehydrogenase (succinyl-transferring)                       | X                        |                               |                                     |                              |                                |
| Pentatricopeptide repeat protein                                         |                          |                               |                                     | X                            |                                |
| Peptidase inhibitor I78 family protein                                   | X                        |                               |                                     |                              |                                |
| Peptidylprolyl isomerase                                                 | X                        |                               |                                     |                              |                                |
| Permease for cytosine/purine, uracil, thiamine, allantoin family protein | X                        |                               |                                     |                              |                                |
| Peroxidase, 2 family protein                                             | X                        |                               |                                     |                              |                                |
| PHD finger domain protein                                                | X                        |                               |                                     |                              |                                |
| Phosphatidate cytidyltransferase,                                        |                          |                               |                                     | X                            |                                |

| Protein Identifier                                              | <i>Aspergillus niger</i> | <i>Aspergillus versicolor</i> | <i>Cladosporium cladosporioides</i> | <i>Paecilomyces variotii</i> | <i>Penicillium chrysogenum</i> |
|-----------------------------------------------------------------|--------------------------|-------------------------------|-------------------------------------|------------------------------|--------------------------------|
| putative                                                        |                          |                               |                                     |                              |                                |
| Phosphatidylinositol 3-kinase VPS34                             |                          |                               |                                     | X                            |                                |
| Phospholipase/carboxylesterase superfamily                      | X                        |                               |                                     |                              |                                |
| Phospholipid-transporting ATPase                                | X                        |                               |                                     |                              |                                |
| Phosphotransferase enzyme family protein                        |                          |                               |                                     | X                            |                                |
| Piwi domain-containing protein                                  |                          | X                             |                                     |                              |                                |
| PKS_ER domain-containing protein                                |                          | X                             |                                     |                              |                                |
| Plasma membrane ATPase                                          |                          | X                             |                                     |                              |                                |
| P-loop containing nucleoside triphosphate hydrolase protein     | X                        |                               |                                     |                              |                                |
| PNK3P-domain-containing protein                                 |                          | X                             |                                     |                              |                                |
| Polarized growth protein Boi2                                   | X                        |                               |                                     |                              |                                |
| Polyketide synthase                                             | X                        |                               | X                                   |                              |                                |
| Polynucleotide adenylyltransferase                              | X                        |                               |                                     |                              |                                |
| Pre-mRNA splicing factor clf1                                   |                          | X                             |                                     |                              |                                |
| Probable glucan endo-1,3-beta-glucosidase eglC                  | X                        |                               |                                     |                              |                                |
| Probable vacuolar protein sorting-associated protein 16 homolog | X                        |                               |                                     |                              |                                |
| Proteasome component                                            |                          | X                             |                                     |                              |                                |
| Protein ecm33                                                   |                          | X                             |                                     |                              |                                |
| Protein kinase domain-containing protein                        | X                        |                               |                                     | X                            |                                |
| Protein kinase Scy1                                             | X                        |                               |                                     |                              |                                |
| Protein NipSnap-like protein                                    |                          |                               |                                     |                              |                                |
| Protein transport protein SEC22                                 |                          |                               |                                     | X                            |                                |
| Putative ABC transporter                                        |                          |                               |                                     | X                            | X                              |
| Putative endo-1, 4-beta-xylanase B domain protein               | X                        |                               |                                     |                              |                                |
| Putative glycoside hydrolase                                    |                          |                               | X                                   |                              |                                |
| Putative mitochondria protein Fmp29                             | X                        |                               |                                     |                              |                                |
| Putative quinone oxidoreductase                                 |                          |                               |                                     |                              | X                              |
| Putative ribonuclease P complex subunit Pop1                    |                          |                               |                                     | X                            |                                |
| Putative RNA-dependent RNA polymerase                           |                          |                               | X                                   |                              | X                              |

| <b>Protein Identifier</b>                            | <b><i>Aspergillus niger</i></b> | <b><i>Aspergillus versicolor</i></b> | <b><i>Cladosporium cladosporioides</i></b> | <b><i>Paecilomyces variotii</i></b> | <b><i>Penicillium chrysogenum</i></b> |
|------------------------------------------------------|---------------------------------|--------------------------------------|--------------------------------------------|-------------------------------------|---------------------------------------|
| Putative ubiquitin-conjugating enzyme Ubc6           |                                 |                                      |                                            | X                                   |                                       |
| Pyrroline-5-carboxylate reductase                    | X                               |                                      |                                            |                                     |                                       |
| Rad4 transglutaminase-like domain-containing protein |                                 | X                                    |                                            |                                     |                                       |
| Raptor N-terminal CASPase like domain family protein | X                               |                                      |                                            |                                     |                                       |
| Related to regulatory protein amdA                   | X                               |                                      |                                            |                                     |                                       |
| Retinol dehydrogenase 12                             | X                               |                                      |                                            |                                     |                                       |
| Rho guanyl nucleotide exchange factor                | X                               |                                      |                                            |                                     |                                       |
| Ribosome biogenesis protein                          | X                               |                                      |                                            |                                     |                                       |
| RING finger domain protein                           | X                               |                                      |                                            |                                     |                                       |
| RNA polymerase-associated protein LEO1               |                                 | X                                    |                                            |                                     |                                       |
| RraA-like protein                                    | X                               |                                      |                                            |                                     |                                       |
| rRNA processing/ribosome biogenesis family protein   | X                               |                                      |                                            |                                     |                                       |
| RTA1 domain protein                                  | X                               |                                      |                                            |                                     |                                       |
| SCD domain-containing protein                        |                                 |                                      |                                            | X                                   |                                       |
| SEC7 domain-containing protein                       | X                               |                                      |                                            |                                     |                                       |
| Secretion pathway protein Sls2/Rcy1                  | X                               |                                      |                                            |                                     |                                       |
| Serine/threonine-protein kinase Tel1                 | X                               |                                      |                                            |                                     |                                       |
| SH3 domain-containing protein                        |                                 |                                      |                                            | X                                   |                                       |
| Short-chain dehydrogenase/reductase family protein   | X                               |                                      |                                            |                                     |                                       |
| Shugoshin                                            |                                 |                                      |                                            | X                                   |                                       |
| Spindle pole body component                          |                                 | X                                    |                                            | X                                   |                                       |
| Sugar transporter family protein                     |                                 |                                      |                                            | X                                   |                                       |
| Superoxide dismutase [Cu-Zn]                         | X                               |                                      |                                            |                                     |                                       |
| T-complex protein 1 subunit alpha                    | X                               |                                      |                                            |                                     |                                       |
| T-complex protein 1 subunit zeta                     | X                               |                                      |                                            |                                     |                                       |
| Terpenoid synthase                                   |                                 |                                      |                                            | X                                   |                                       |
| Tetratricopeptide repeat domain protein              | X                               |                                      |                                            |                                     |                                       |
| Thiolase-like protein                                | X                               |                                      |                                            |                                     |                                       |
| Thioredox_DsbH domain-containing protein             | X                               |                                      |                                            |                                     |                                       |



| <b>Protein Identifier</b>                       | <i>Aspergillus niger</i> | <i>Aspergillus versicolor</i> | <i>Cladosporium cladosporioides</i> | <i>Paecilomyces variotii</i> | <i>Penicillium chrysogenum</i> |
|-------------------------------------------------|--------------------------|-------------------------------|-------------------------------------|------------------------------|--------------------------------|
| THO complex subunit 2                           |                          |                               |                                     | X                            |                                |
| Threonylcarbamoyl-AMP synthase                  |                          | X                             |                                     |                              |                                |
| TPR-like protein                                | X                        |                               |                                     |                              |                                |
| Transcription factor hoxa13                     | X                        |                               |                                     |                              |                                |
| Transcription factor TFIIA complex subunit Toa1 | X                        |                               |                                     |                              |                                |
| tRNA wybutosine-synthesizing protein 4          | X                        |                               |                                     |                              |                                |
| tRNA-dihydrouridine(47) synthase [NAD(P)(+)]    |                          | X                             |                                     |                              |                                |
| Type II protein arginine methyltransferase      | X                        |                               |                                     |                              |                                |
| U3 snoRNA associated family protein             | X                        |                               |                                     |                              |                                |
| Vacuolar calcium ion transporter                |                          |                               |                                     |                              |                                |
| Vacuolar segregation protein                    | X                        |                               |                                     |                              |                                |
| Vacuolar serine protease (Fragment)             |                          |                               | X                                   |                              | X                              |
| Vegetative cell wall protein gp1                | X                        |                               |                                     |                              |                                |
| VHS domain protein                              | X                        |                               |                                     |                              |                                |
| WD domain containing protein                    | X                        |                               |                                     |                              |                                |
| Zinc knuckle transcription factor               | X                        |                               |                                     |                              |                                |
| Zinc-binding dehydrogenase family protein       | X                        |                               |                                     |                              |                                |
| Zn(2)-C6 fungal-type domain-containing protein  | X                        | X                             |                                     |                              |                                |
| Zn(II)2Cys6 transcription factor                | X                        |                               |                                     |                              |                                |
| ZT dimer domain-containing protein              |                          |                               |                                     | X                            |                                |
| <b>Total Count = 222</b>                        | <b>135</b>               | <b>47</b>                     | <b>7</b>                            | <b>40</b>                    | <b>9</b>                       |

**Table S7.** Mean and SE for two fungi at each of four stages.

| <b>Fungus</b>             | <b>Group</b>      | <b>Mean</b> | <b>SEM</b> |
|---------------------------|-------------------|-------------|------------|
| <i>A. versicolor</i>      | Post-Growth       | 24.2        | 1.4        |
|                           | Before Filtration | 40.1        | 1.4        |
|                           | After Filtration  | 18.6        | 1.8        |
|                           | 48 h Post-Spike   | 18.2        | 1.4        |
| <i>C. cladosporioides</i> | Post-Growth       | 20.1        | 1.4        |
|                           | Before Filtration | 20.8        | 1.4        |
|                           | After Filtration  | 18.0        | 1.8        |
|                           | 48 h Post-Spike   | 17.2        | 1.4        |

**Table S8.** Comparisons for factor: Stage within *A. versicolor*.

| <b>Comparison</b>                      | <b>Diff of Means</b> | <b>t</b> | <b>P</b> | <b>P&lt;0.050</b> |
|----------------------------------------|----------------------|----------|----------|-------------------|
| Before Filtration vs. 48 h post-spike  | 22.0                 | 10.830   | <0.001   | Yes               |
| Before Filtration vs. After Filtration | 21.5                 | 9.497    | <0.001   | Yes               |
| Before Filtration vs. Post-Growth      | 16.0                 | 7.886    | <0.001   | Yes               |
| Post-Growth vs. 48 h Post-Spike        | 6.0                  | 2.945    | 0.016    | Yes               |
| Post-Growth vs. After Filtration       | 5.5                  | 2.444    | 0.037    | Yes               |
| After Filtration vs. 48 h Post-Spike   | 0.4                  | 0.190    | 0.850    | No                |

**Table S9.** Comparisons for factor: Stage within *C. cladosporioides*.

| <b>Comparison</b>                      | <b>Diff of Means</b> | <b>t</b> | <b>P</b> | <b>P&lt;0.050</b> |
|----------------------------------------|----------------------|----------|----------|-------------------|
| Before Filtration vs. 48 h Post-Spike  | 3.6                  | 1.758    | 0.417    | No                |
| Post-Growth vs. 48 h Post-Spike        | 2.8                  | 1.406    | 0.599    | No                |
| Before Filtration vs. After Filtration | 2.8                  | 1.244    | 0.631    | No                |
| Post-Growth vs. After Filtration       | 2.1                  | 0.928    | 0.736    | No                |
| Before Filtration vs. Post-Growth      | 0.7                  | 0.353    | 0.925    | No                |
| After Filtration vs. 48 h Post-Spike   | 0.7                  | 0.329    | 0.925    | No                |

**Table S10.** Protein levels between both fungi compared at each stage in the process.

| <b>Factors compared between fungi</b> | <b>Diff of Means</b> | <b>t</b> | <b>P</b> | <b>P&lt;0.050</b> |
|---------------------------------------|----------------------|----------|----------|-------------------|
| Post-Growth                           | 4.1                  | 2.022    | 0.050    | Yes               |
| Before Filtration                     | 19.3                 | 9.555    | <0.001   | Yes               |
| After Filtration                      | 0.7                  | 0.267    | 0.791    | No                |
| 48 h Post-Spike                       | 1.0                  | 0.483    | 0.632    | No                |

**Table S11.** Top 25 metabolites in *Aspergillus niger* exudate following 1 mM Zn challenge.

| Number of Metabolite                                | <i>Aspergillus niger</i>                          |              |
|-----------------------------------------------------|---------------------------------------------------|--------------|
|                                                     | Name of metabolite                                | % of total   |
| 1                                                   | Hexylamine                                        | 12.63        |
| 2                                                   | Sulfamic acid                                     | 6.07         |
| 3                                                   | 4-Imidazolemethanol                               | 5.60         |
| 4                                                   | (1S,4S)-4-Hydroxy-3-oxocyclohexanecarboxylic acid | 4.94         |
| 5                                                   | N6-Acetyl-L-lysine*                               | 3.52         |
| 6                                                   | L-Pyroglutamic acid*                              | 2.50         |
| 7                                                   | N6,N6,N6-Trimethyl-L-lysine*                      | 1.77         |
| 8                                                   | Cyclohexane                                       | 1.71         |
| 9                                                   | 2'-O-Methyladenosine*                             | 1.62         |
| 10                                                  | N-(Carboxymethyl)norleucine                       | 1.45         |
| 11                                                  | ⊖*                                                | 1.02         |
| 12                                                  | NP-012972*                                        | 0.93         |
| 13                                                  | Palmitoleic Acid*                                 | 0.90         |
| 14                                                  | 13(S)-HOTrE*                                      | 0.88         |
| 15                                                  | Pyrimidine                                        | 0.86         |
| 16                                                  | Allysine                                          | 0.85         |
| 17                                                  | [Similar to: Thiamine; ΔMass: -0.2644 Da]*        | 0.78         |
| 18                                                  | 2-Heptyl-4,5-dimethyl-1,3-oxazole                 | 0.74         |
| 19                                                  | Triacetin                                         | 0.67         |
| 20                                                  | Dichloroacetic acid                               | 0.63         |
| 21                                                  | 16±-Hydroxydehydroepiandrosterone 3-sulfate       | 0.61         |
| 22                                                  | Bis(methylbenzylidene)sorbitol*                   | 0.61         |
| 23                                                  | 2-Hydroxyfelbamate                                | 0.60         |
| 24                                                  | 1-(1H-Imidazol-5-yl)-3-(phosphonoxy)-2-propanone  | 0.59         |
| 25                                                  | (12Z)-9,10,11-trihydroxyoctadec-12-enoic acid*    | 0.57         |
| <b>% of Metabolome By Top 25 Hits (Grand Total)</b> |                                                   | <b>53.05</b> |

| LEGEND |                                                                                                                             |
|--------|-----------------------------------------------------------------------------------------------------------------------------|
| *      | MS2-based match (higher confidence level)                                                                                   |
| ⊖      | [Similar to: 2-[3-chloro-2-hydroxy-4-methoxy-6-(methoxycarbonyl)phenoxy]-6-hydroxy-4-methylbenzoic acid; ΔMass: -6.7938 Da] |
| ψ      | 4-(2,6-dimethylphenyl)-5-(7-oxabicyclo[2.2.1]hept-2-yl)-2,4-dihydro-3H-1,2,4-triazole-3-thione                              |
| Ω      | 5,7-dihydroxy-2-(4-hydroxy-3-methoxyphenyl)-3,4-dihydro-2H-1-benzopyran-4-one                                               |
| Λ      | (2S)-4-Methyl-2-(((3S,4S,5R)-2,3,4-trihydroxy-5-(hydroxymethyl)tetrahydro-2-furanyl)methyl)amino)pentanoic acid             |
| ⊕      | 2-[[2Z)-2-((4-[(3-Aminopropyl)amino]butyl)imino)-2-hydroxyethyl]-2-hydroxysuccinic acid                                     |

**Table S12.** Top 25 metabolites in *Aspergillus versicolor* exudate following 1 mM Zn challenge.

| Number of Metabolite                            | <i>Aspergillus versicolor</i>                    |            |
|-------------------------------------------------|--------------------------------------------------|------------|
|                                                 | Name of metabolite                               | % of total |
| 1                                               | Sulfamic acid                                    | 12.47      |
| 2                                               | Hexylamine                                       | 8.79       |
| 3                                               | 4-Imidazolemethanol                              | 5.40       |
| 4                                               | δ-Valerolactam*                                  | 4.44       |
| 5                                               | Aminopyrrolnitrin                                | 2.70       |
| 6                                               | Thiamine*                                        | 2.66       |
| 7                                               | 2'-O-Methyladenosine*                            | 1.96       |
| 8                                               | O-ureido-D-serine                                | 1.93       |
| 9                                               | Isovalerylglutamic acid*                         | 1.49       |
| 10                                              | Fomepizole                                       | 1.41       |
| 11                                              | [Similar to: Thiamine; ΔMass: -0.2644 Da]*       | 1.41       |
| 12                                              | L-alpha-Glycerolphosphorylcholine                | 1.28       |
| 13                                              | 1-(1H-Imidazol-5-yl)-3-(phosphonoxy)-2-propanone | 1.25       |
| 14                                              | cGMP                                             | 1.24       |
| 15                                              | Pyrimidine                                       | 1.20       |
| 16                                              | Ω*                                               | 1.20       |
| 17                                              | Θ*                                               | 1.05       |
| 18                                              | Hexamethylenetetramine*                          | 0.75       |
| 19                                              | Apocynin                                         | 0.73       |
| 20                                              | L-Pyroglutamic acid*                             | 0.71       |
| 21                                              | Ψ*                                               | 0.68       |
| 22                                              | Acetylcholine*                                   | 0.64       |
| 23                                              | S-(-)-Raclopride*                                | 0.63       |
| 24                                              | D-ribosylnicotinate                              | 0.62       |
| 25                                              | Guvacine                                         | 0.59       |
| Percentage of metabolome covered by top 25 hits |                                                  | 57.22      |

| LEGEND |                                                                                                                             |
|--------|-----------------------------------------------------------------------------------------------------------------------------|
| *      | MS2-based match (higher confidence level)                                                                                   |
| Θ      | [Similar to: 2-[3-chloro-2-hydroxy-4-methoxy-6-(methoxycarbonyl)phenoxy]-6-hydroxy-4-methylbenzoic acid; ΔMass: -6.7938 Da] |
| Ψ      | 4-(2,6-dimethylphenyl)-5-(7-oxabicyclo[2.2.1]hept-2-yl)-2,4-dihydro-3H-1,2,4-triazole-3-thione                              |
| Ω      | 5,7-dihydroxy-2-(4-hydroxy-3-methoxyphenyl)-3,4-dihydro-2H-1-benzopyran-4-one                                               |
| Λ      | (2S)-4-Methyl-2-(((3S,4S,5R)-2,3,4-trihydroxy-5-(hydroxymethyl)tetrahydro-2-furanyl)methyl)amino)pentanoic acid             |
| Φ      | 2-[[[2Z]-2-[[4-[[[3-Aminopropyl]amino]butyl]imino]-2-hydroxyethyl]-2-hydroxysuccinic acid                                   |

**Table S13.** Top 25 metabolites in *Cladosporium cladosporioides* exudate following 1 mM Zn challenge.

| <i>Cladosporium cladosporioides</i>             |                                                          |            |
|-------------------------------------------------|----------------------------------------------------------|------------|
| Number of Metabolite                            | Name of metabolite                                       | % of total |
| 1                                               | Sulfamic acid                                            | 24.18      |
| 2                                               | Hexylamine                                               | 10.10      |
| 3                                               | Ω*                                                       | 8.63       |
| 4                                               | [Similar to: Thiamine; ΔMass: -0.2644 Da]*               | 4.07       |
| 5                                               | (1S,4S)-4-Hydroxy-3-oxocyclohexanecarboxylic acid        | 3.74       |
| 6                                               | Pyrimidine                                               | 3.61       |
| 7                                               | 4-Imidazolemethanol                                      | 3.47       |
| 8                                               | PD-0333941*                                              | 1.11       |
| 9                                               | Apocynin                                                 | 0.99       |
| 10                                              | 1-(1H-Imidazol-5-yl)-3-(phosphonoxy)-2-propanone         | 0.92       |
| 11                                              | Θ*                                                       | 0.84       |
| 12                                              | Deanol                                                   | 0.83       |
| 13                                              | δ-Valerolactam*                                          | 0.76       |
| 14                                              | Butyryl-L-homoserine lactone                             | 0.60       |
| 15                                              | N6-Acetyl-L-lysine*                                      | 0.60       |
| 16                                              | NLK*                                                     | 0.60       |
| 17                                              | Λ                                                        | 0.58       |
| 18                                              | NP-005394*                                               | 0.57       |
| 19                                              | L-Pyroglutamic acid*                                     | 0.57       |
| 20                                              | Φ                                                        | 0.56       |
| 21                                              | N6,N6,N6-Trimethyl-L-lysine*                             | 0.53       |
| 22                                              | Triacetin                                                | 0.51       |
| 23                                              | 16 <sup>±</sup> -Hydroxydehydroepiandrosterone 3-sulfate | 0.48       |
| 24                                              | Bis(methylbenzylidene)sorbitol*                          | 0.48       |
| 25                                              | ZV4                                                      | 0.46       |
| Percentage of metabolome covered by top 25 hits |                                                          | 69.79      |

| LEGEND |                                                                                                                             |
|--------|-----------------------------------------------------------------------------------------------------------------------------|
| *      | MS2-based match (higher confidence level)                                                                                   |
| Θ      | [Similar to: 2-[3-chloro-2-hydroxy-4-methoxy-6-(methoxycarbonyl)phenoxy]-6-hydroxy-4-methylbenzoic acid; ΔMass: -6.7938 Da] |
| Ψ      | 4-(2,6-dimethylphenyl)-5-(7-oxabicyclo[2.2.1]hept-2-yl)-2,4-dihydro-3H-1,2,4-triazole-3-thione                              |
| Ω      | 5,7-dihydroxy-2-(4-hydroxy-3-methoxyphenyl)-3,4-dihydro-2H-1-benzopyran-4-one                                               |
| Λ      | (2S)-4-Methyl-2-(((3S,4S,5R)-2,3,4-trihydroxy-5-(hydroxymethyl)tetrahydro-2-furanyl)methyl)amino)pentanoic acid             |
| Φ      | 2-((2Z)-2-((4-((3-Aminopropyl)amino)butyl)imino)-2-hydroxyethyl)-2-hydroxysuccinic acid                                     |



**Table S14.** Top 25 metabolites in *Paecilomyces variotii* exudate following 1 mM Zn challenge.

| Number of Metabolite                            | <i>Paecilomyces variotii</i>                               |            |
|-------------------------------------------------|------------------------------------------------------------|------------|
|                                                 | Name of metabolite                                         | % of total |
| 1                                               | Hexylamine                                                 | 16.25      |
| 2                                               | Sulfamic acid                                              | 13.47      |
| 3                                               | 4-Imidazolemethanol                                        | 2.85       |
| 4                                               | 5-chloro-2,8-dimethyl-4-[(3-nitro-2-pyridyl)oxy]quinoline* | 2.84       |
| 5                                               | g-Butyrobetaine                                            | 2.24       |
| 6                                               | cGMP                                                       | 1.93       |
| 7                                               | [Similar to: Thiamine; ΔMass: -0.2644 Da]*                 | 1.90       |
| 8                                               | δ-Valerolactam*                                            | 1.63       |
| 9                                               | 2'-O-Methyladenosine*                                      | 1.38       |
| 10                                              | Cytidine 3',5'-cyclic monophosphate                        | 1.24       |
| 11                                              | N-valeryl-Glycine                                          | 1.22       |
| 12                                              | N-(Carboxymethyl)norleucine                                | 1.06       |
| 13                                              | (1S,4S)-4-Hydroxy-3-oxocyclohexanecarboxylic acid          | 1.03       |
| 14                                              | 2',3'-Cyclic UMP                                           | 0.92       |
| 15                                              | 2-amino-2,3,7-trideoxy-D-lyxo-hept-6-ulosonic acid         | 0.91       |
| 16                                              | 1H-Imidazol-2-ol                                           | 0.83       |
| 17                                              | NLK*                                                       | 0.78       |
| 18                                              | N6-Acetyl-L-lysine*                                        | 0.78       |
| 19                                              | N6,N6,N6-Trimethyl-L-lysine*                               | 0.78       |
| 20                                              | Amfepramone*                                               | 0.71       |
| 21                                              | ⊖*                                                         | 0.70       |
| 22                                              | D-PANTOTHENIC ACID                                         | 0.69       |
| 23                                              | NP-019722*                                                 | 0.69       |
| 24                                              | 5,7-Dihydroxy-4-methylcoumarin*                            | 0.64       |
| 25                                              | b-Ala-Lys                                                  | 0.61       |
| Percentage of metabolome covered by top 25 hits |                                                            | 58.07      |

| LEGEND |                                                                                                                             |
|--------|-----------------------------------------------------------------------------------------------------------------------------|
| *      | MS2-based match (higher confidence level)                                                                                   |
| ⊖      | [Similar to: 2-[3-chloro-2-hydroxy-4-methoxy-6-(methoxycarbonyl)phenoxy]-6-hydroxy-4-methylbenzoic acid; ΔMass: -6.7938 Da] |
| ψ      | 4-(2,6-dimethylphenyl)-5-(7-oxabicyclo[2.2.1]hept-2-yl)-2,4-dihydro-3H-1,2,4-triazole-3-thione                              |
| Ω      | 5,7-dihydroxy-2-(4-hydroxy-3-methoxyphenyl)-3,4-dihydro-2H-1-benzopyran-4-one                                               |
| Λ      | (2S)-4-Methyl-2-(((3S,4S,5R)-2,3,4-trihydroxy-5-(hydroxymethyl)tetrahydro-2-furanyl)methyl)amino)pentanoic acid             |
| ⊕      | 2-[(2Z)-2-((4-[(3-Aminopropyl)amino]butyl)imino)-2-hydroxyethyl]-2-hydroxysuccinic acid                                     |

**Table S15.** Top 25 metabolites in *Penicillium chrysogenum* exudate following 1 mM Zn challenge.

| Number of Metabolite                            | <i>Penicillium chrysogenum</i>                      |            |
|-------------------------------------------------|-----------------------------------------------------|------------|
|                                                 | Name of metabolite                                  | % of total |
| 1                                               | Hexylamine                                          | 17.22      |
| 2                                               | Sulfamic acid                                       | 13.57      |
| 3                                               | Ω*                                                  | 9.35       |
| 4                                               | 4-Imidazolmethanol                                  | 5.10       |
| 5                                               | [Similar to: Thiamine; ΔMass: -0.2644 Da]*          | 1.94       |
| 6                                               | δ-Valerolactam*                                     | 1.64       |
| 7                                               | N-valeryl-Glycine                                   | 1.43       |
| 8                                               | (3S)-3-(Pentanoyloxy)-4-(trimethylammonio)butanoate | 1.41       |
| 9                                               | PD-0333941*                                         | 1.14       |
| 10                                              | Pyrimidine                                          | 1.05       |
| 11                                              | D-PANTOTHENIC ACID                                  | 0.93       |
| 12                                              | NP-019722*                                          | 0.93       |
| 13                                              | 1-Nitrosopyrrolidine (NPYR)*                        | 0.92       |
| 14                                              | D-ribosylnicotinate                                 | 0.92       |
| 15                                              | Fomepizole                                          | 0.84       |
| 16                                              | Nicotinic acid*                                     | 0.82       |
| 17                                              | 2',3'-Cyclic UMP                                    | 0.81       |
| 18                                              | cGMP                                                | 0.81       |
| 19                                              | DL-Mevalonic acid                                   | 0.77       |
| 20                                              | Mevalonolactone*                                    | 0.76       |
| 21                                              | Θ*                                                  | 0.74       |
| 22                                              | Pyridoxine*                                         | 0.74       |
| 23                                              | l-Histidinal                                        | 0.70       |
| 24                                              | Thiamine*                                           | 0.66       |
| 25                                              | Sorbic acid*                                        | 0.65       |
| Percentage of metabolome covered by top 25 hits |                                                     | 65.85      |

| LEGEND |                                                                                                                             |
|--------|-----------------------------------------------------------------------------------------------------------------------------|
| *      | MS2-based match (higher confidence level)                                                                                   |
| Θ      | [Similar to: 2-[3-chloro-2-hydroxy-4-methoxy-6-(methoxycarbonyl)phenoxy]-6-hydroxy-4-methylbenzoic acid; ΔMass: -6.7938 Da] |
| Ψ      | 4-(2,6-dimethylphenyl)-5-(7-oxabicyclo[2.2.1]hept-2-yl)-2,4-dihydro-3H-1,2,4-triazole-3-thione                              |
| Ω      | 5,7-dihydroxy-2-(4-hydroxy-3-methoxyphenyl)-3,4-dihydro-2H-1-benzopyran-4-one                                               |
| Λ      | (2S)-4-Methyl-2-(((3S,4S,5R)-2,3,4-trihydroxy-5-(hydroxymethyl)tetrahydro-2-furanyl)methyl)amino)pentanoic acid             |
| Φ      | 2-[[2Z]-2-(4-[[3-Aminopropyl]amino]butyl)imino]-2-hydroxyethyl]-2-hydroxysuccinic acid                                      |

**Table S16.** Top 25 metabolites in *Aspergillus versicolor* exudate without Zn challenge.

| Number of Metabolite                            | <i>Aspergillus versicolor</i> (no Zn challenge) |            |
|-------------------------------------------------|-------------------------------------------------|------------|
|                                                 | Name of metabolite                              | % of total |
| 1                                               | Betaine*                                        | 26.4       |
| 2                                               | Cinnamic acid                                   | 7.4        |
| 3                                               | L-Norleucine*                                   | 6.6        |
| 4                                               | Betaine*                                        | 5.0        |
| 5                                               | Carbamazepine*                                  | 3.9        |
| 6                                               | DL-Tryptophan*                                  | 3.4        |
| 7                                               | Phosphoric acid                                 | 2.7        |
| 8                                               | Isoleucine*                                     | 2.7        |
| 9                                               | Choline O-Sulfate                               | 2.6        |
| 10                                              | oxazolidinone                                   | 2.4        |
| 11                                              | $\delta$ -Valerolactam*                         | 2.3        |
| 12                                              | N-valeryl-Glycine                               | 1.8        |
| 13                                              | 3-(3,4-dihydroxyphenyl)propanoic acid*          | 1.5        |
| 14                                              | THTC*                                           | 1.2        |
| 15                                              | DL-Arginine*                                    | 1.1        |
| 16                                              | Piperidine                                      | 1.1        |
| 17                                              | Proline*                                        | 1.1        |
| 18                                              | Hexylamine                                      | 1.0        |
| 19                                              | Piperidine                                      | 1.0        |
| 20                                              | Uric acid*                                      | 0.9        |
| 21                                              | Propamocarb                                     | 0.9        |
| 22                                              | Choline*                                        | 0.7        |
| 23                                              | 2'-O-Methyladenosine*                           | 0.7        |
| 24                                              | 3-Buten-1-amine                                 | 0.7        |
| 25                                              | Thiamine*                                       | 0.7        |
| Percentage of metabolome covered by top 25 hits |                                                 | 79.7       |

\* MS2-based match (higher confidence level)

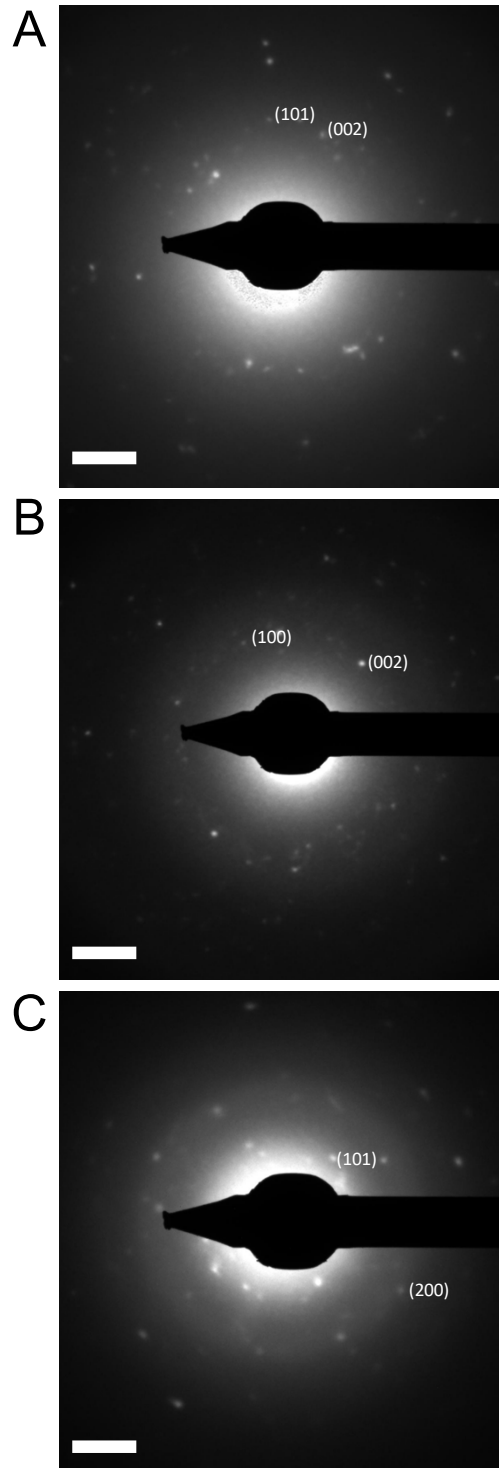

**Figure S1.** Electron diffraction patterns of ZnO obtained from challenged *A. versicolor* exudate (A), HMTA non-biological control (B), and unchallenged *A. versicolor* exudate (C). Indexed spots correspond to hexagonal confirmation of ZnO, ICDD#: 00-036-1451.

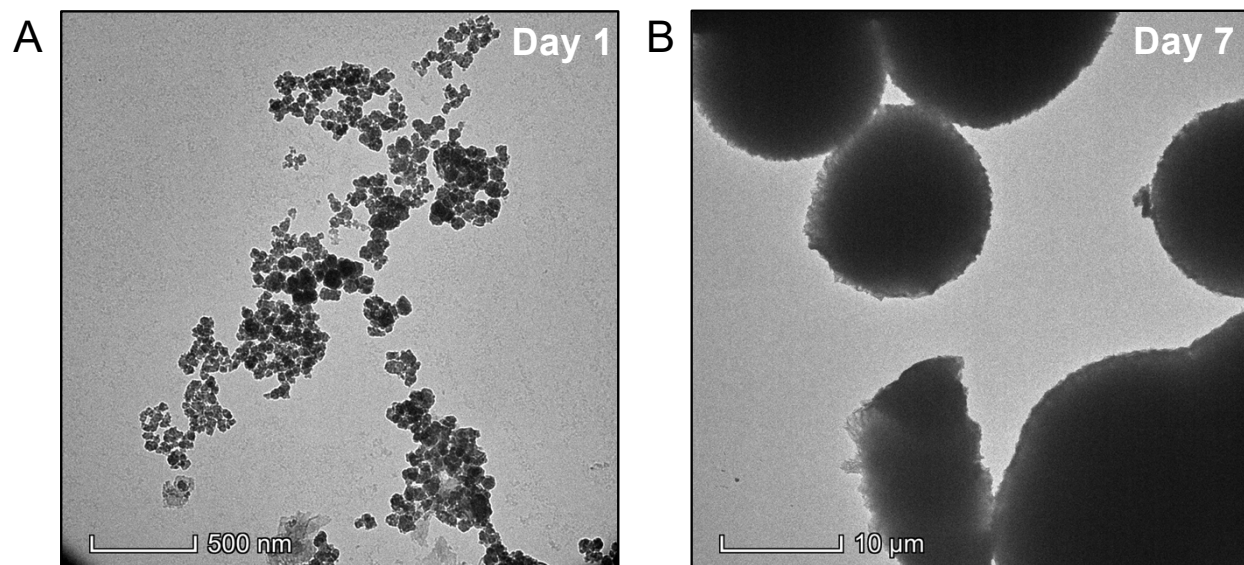

**Figure S2.** Non-biological control containing HMTA and Zn only, drop casted 24 h after synthesis (A), and following one week in solution at room temperature (B).
